# Supplementary material for: Asymmetric Friedel–Crafts alkylation of indoles with 3-nitro-2H-chromenes catalyzed by diphenylamine-linked bis(oxazoline) and bis(thiazoline) Zn(II) complexes
Source: Royal Society of Chemistry journal article supplement (doi:10.1039/c2ob25360g), 2012-01-01
Supplement: c2ob25360g.pdf [file c2ob25360g.pdf]

**Asymmetric Friedel-Crafts alkylation of indoles with  
3-nitro-2*H*-chromenes catalyzed by diphenylamine-linked  
bis(oxazoline) and bis(thiazoline) Zn(II) complexes**

Yang Jia, Wen Yang and Da-Ming Du\*  
*School of Chemical Engineering and Environment, Beijing Institute of Technology,  
Beijing 100081, People's Republic of China*  
[dudm@bit.edu.cn](mailto:dudm@bit.edu.cn)

***Supporting Information***

**Contents**

|                                                                                |     |
|--------------------------------------------------------------------------------|-----|
| Copies of <sup>1</sup> H and <sup>13</sup> C NMR spectra of new compounds..... | S1  |
| Copies of HPLC chromatographs of Friedel-Crafts alkylation products.....       | S16 |

### Copies of $^1\text{H}$ and $^{13}\text{C}$ NMR spectra of new compounds

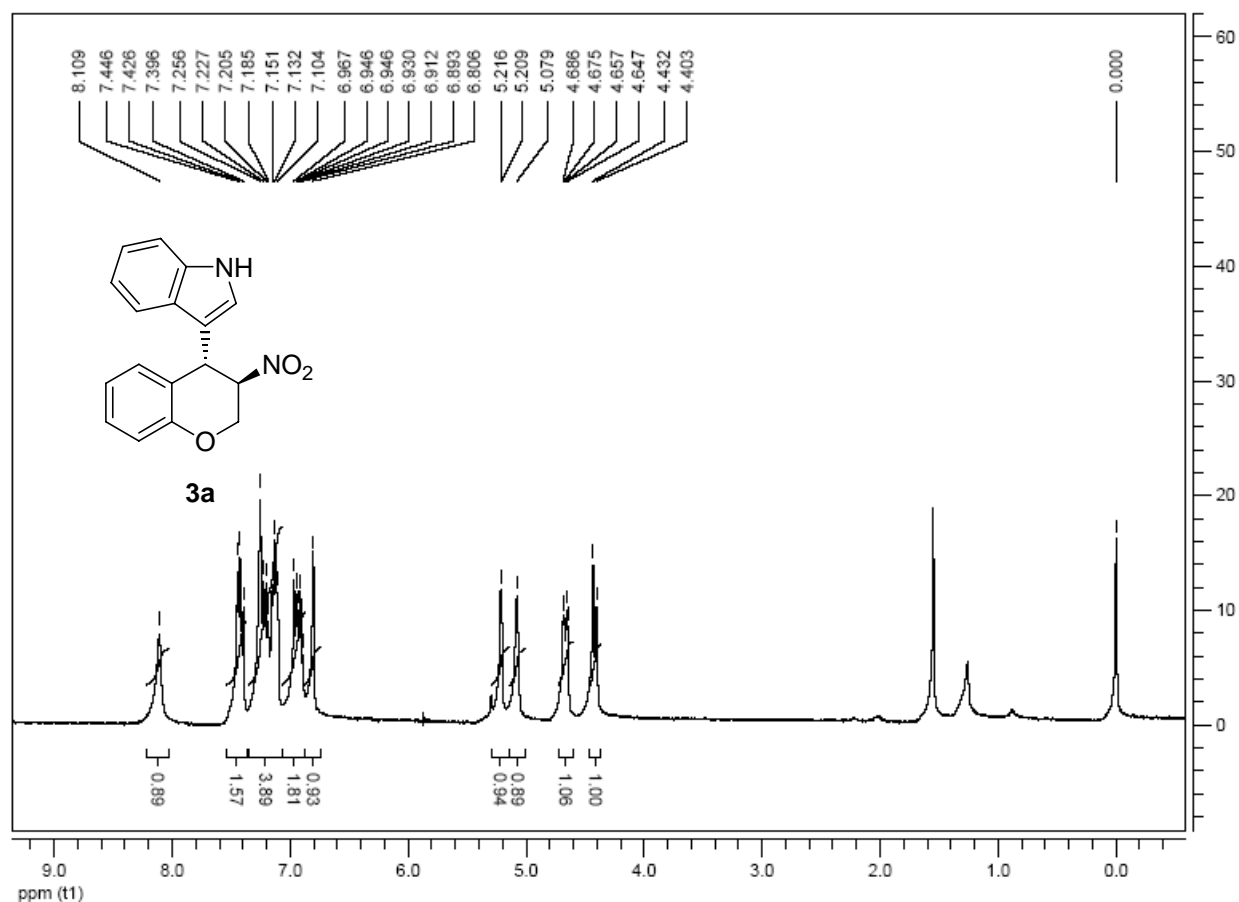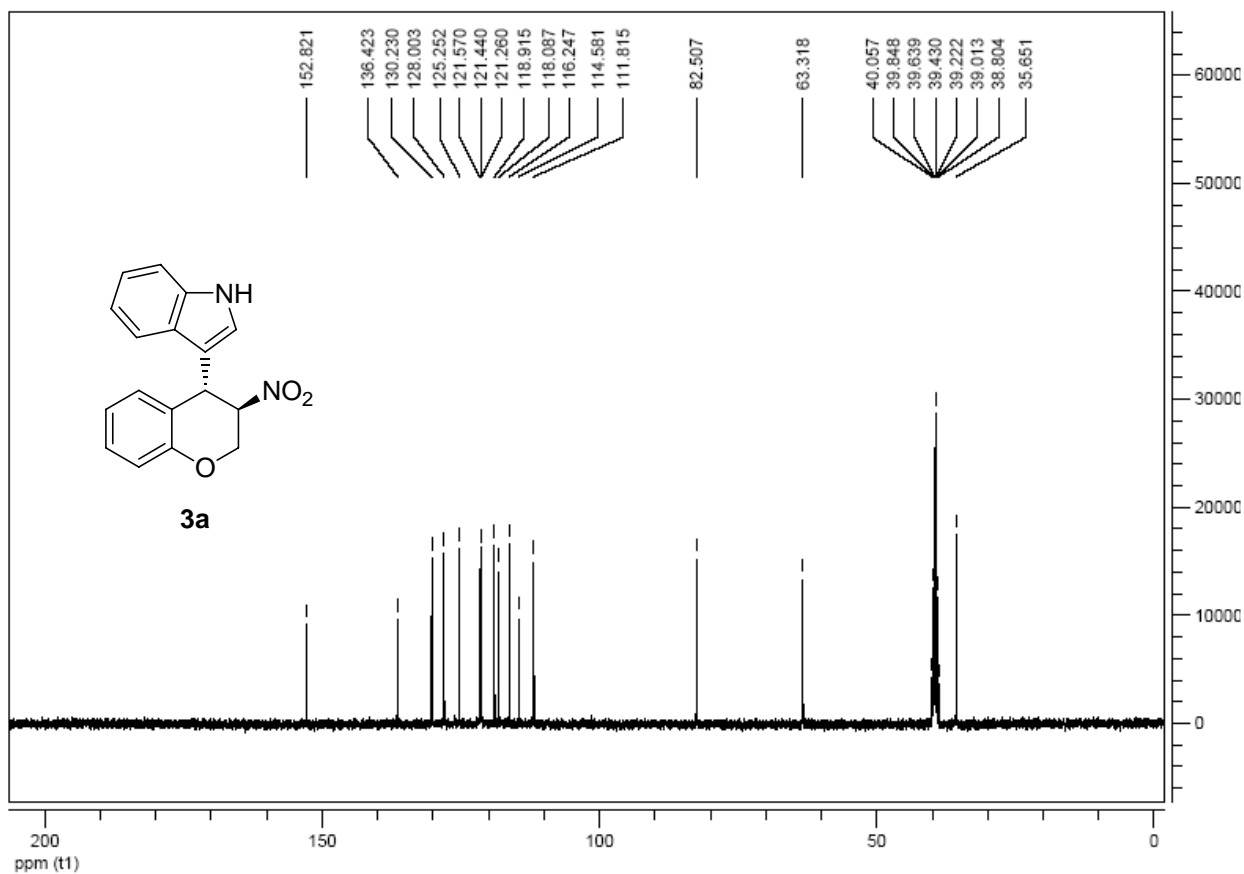

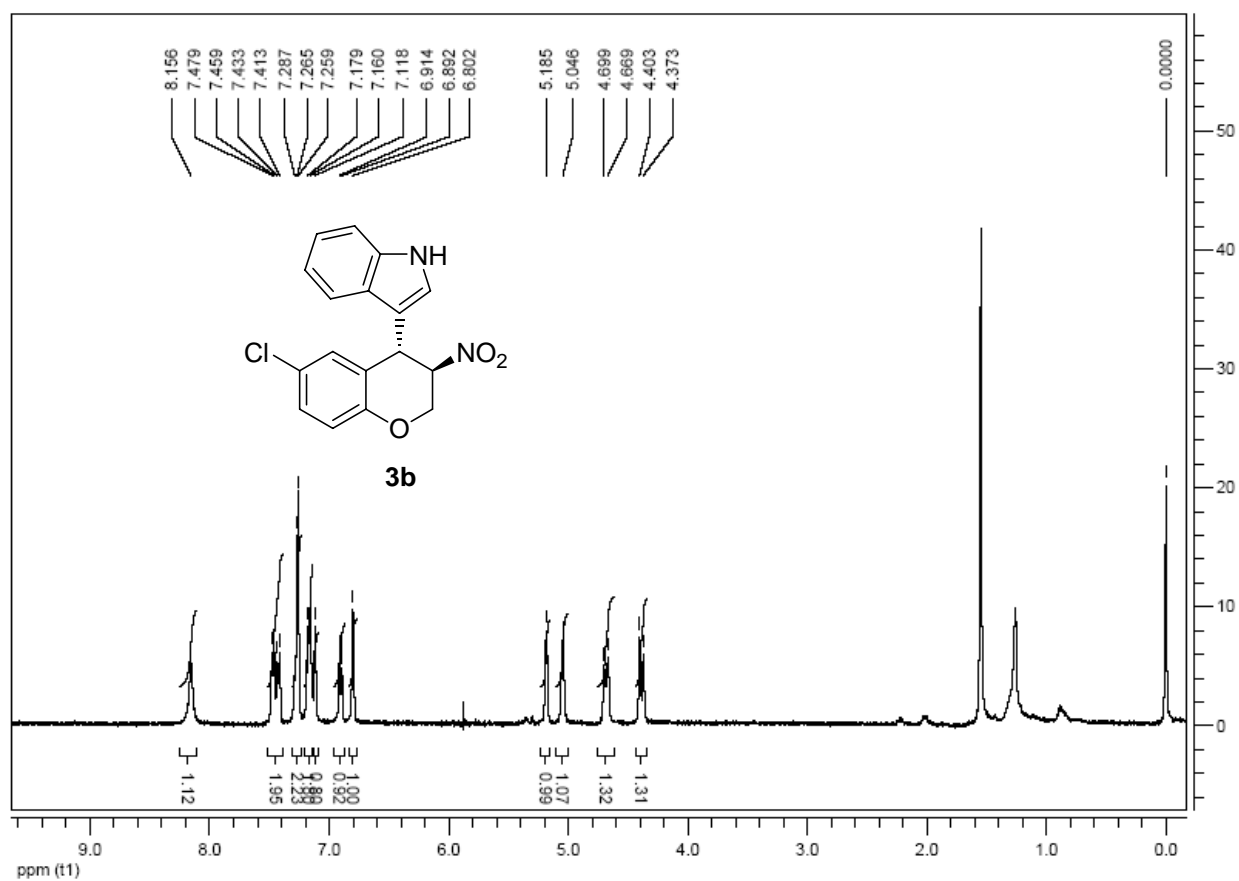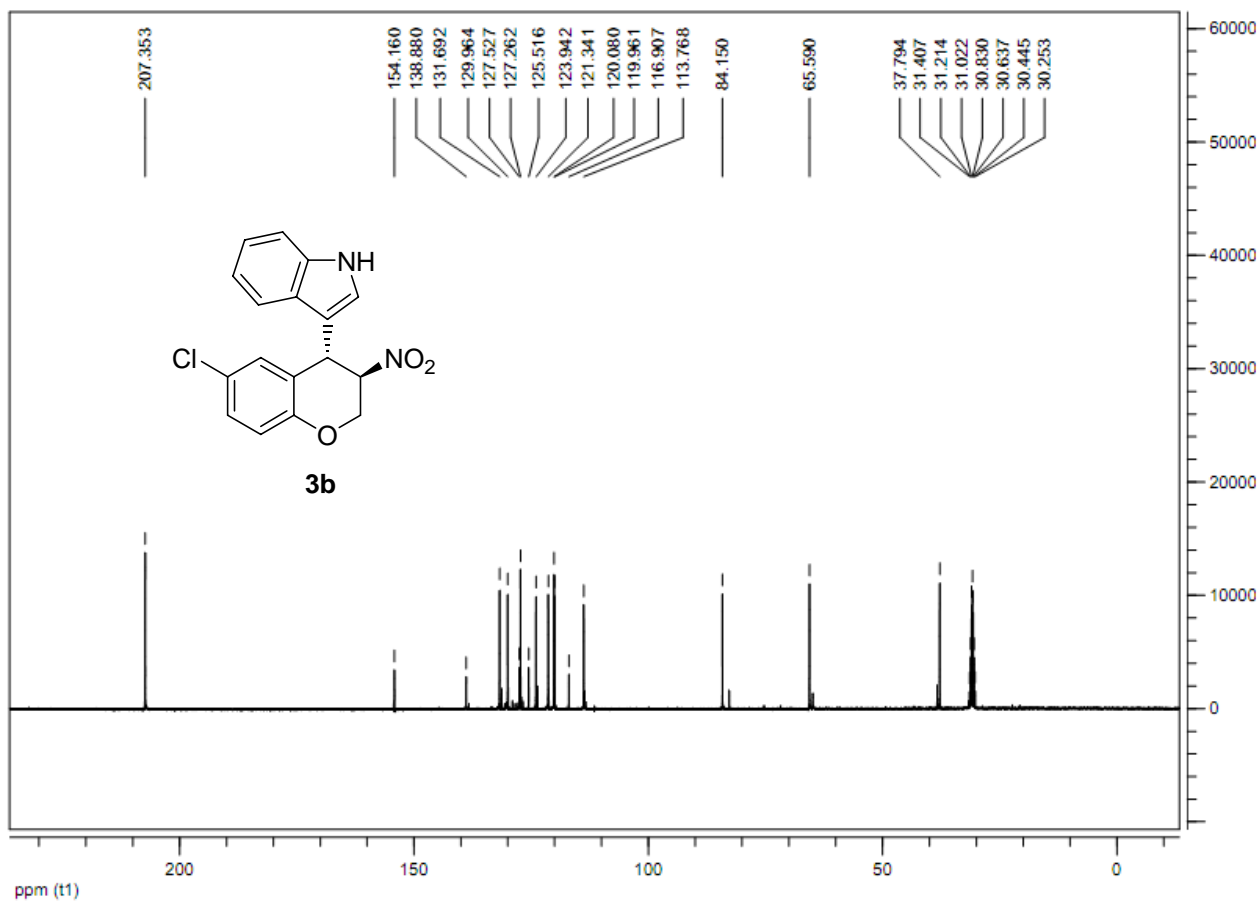

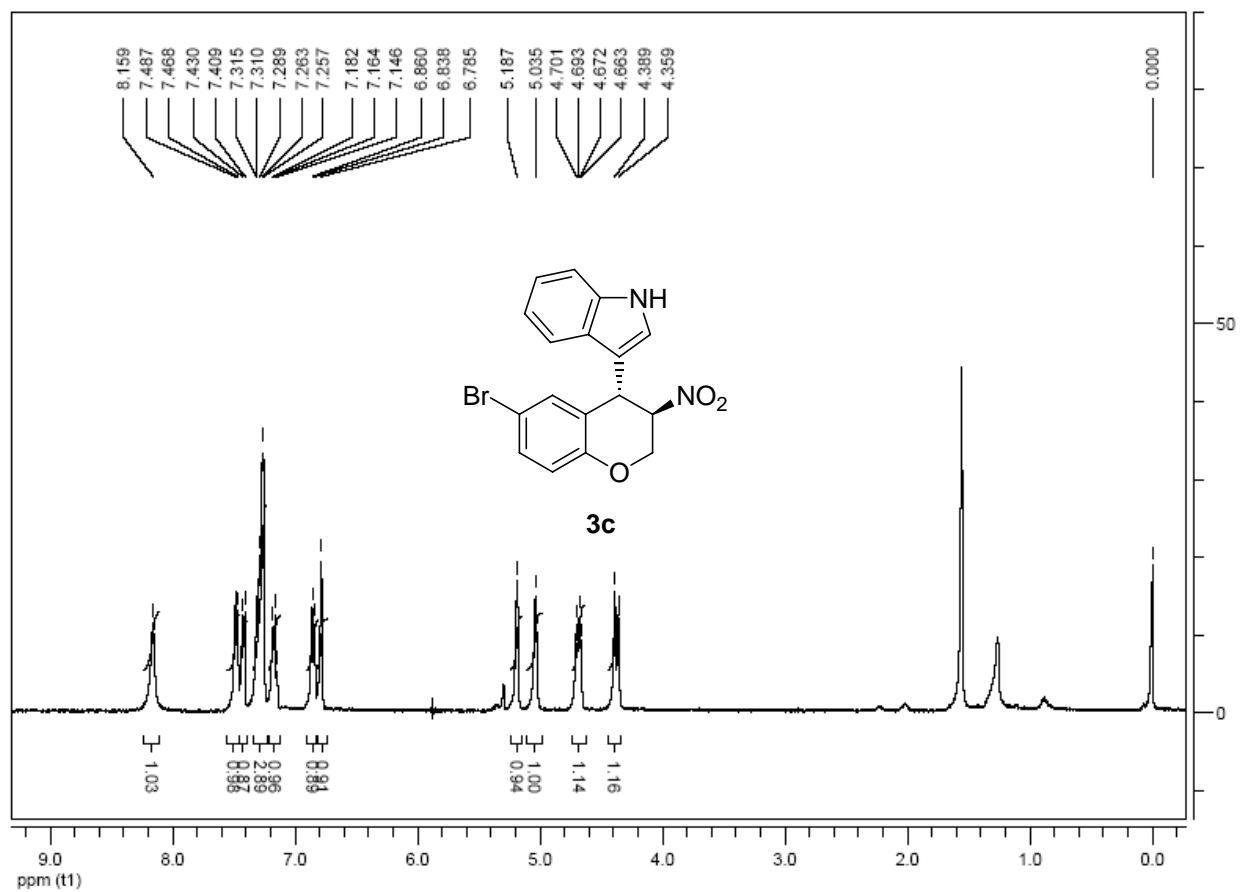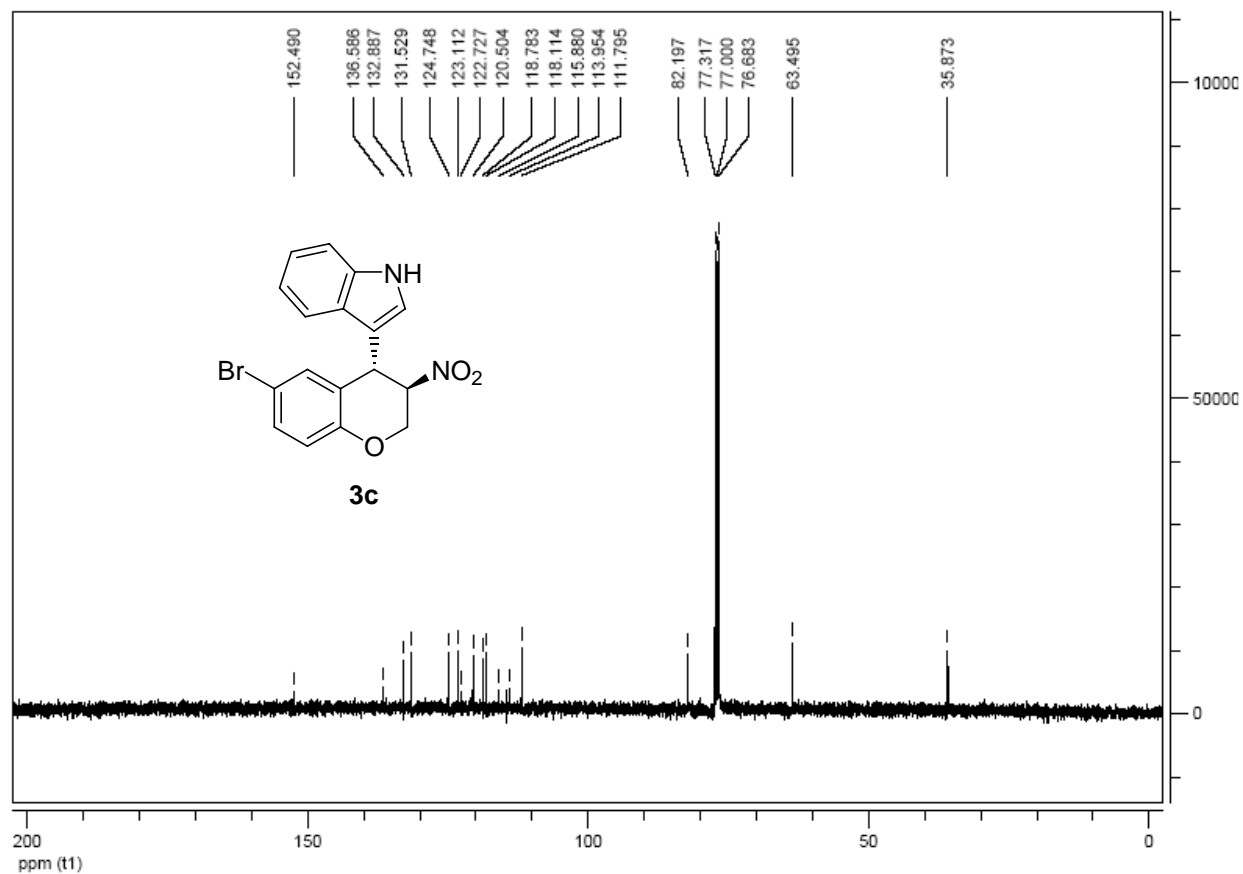



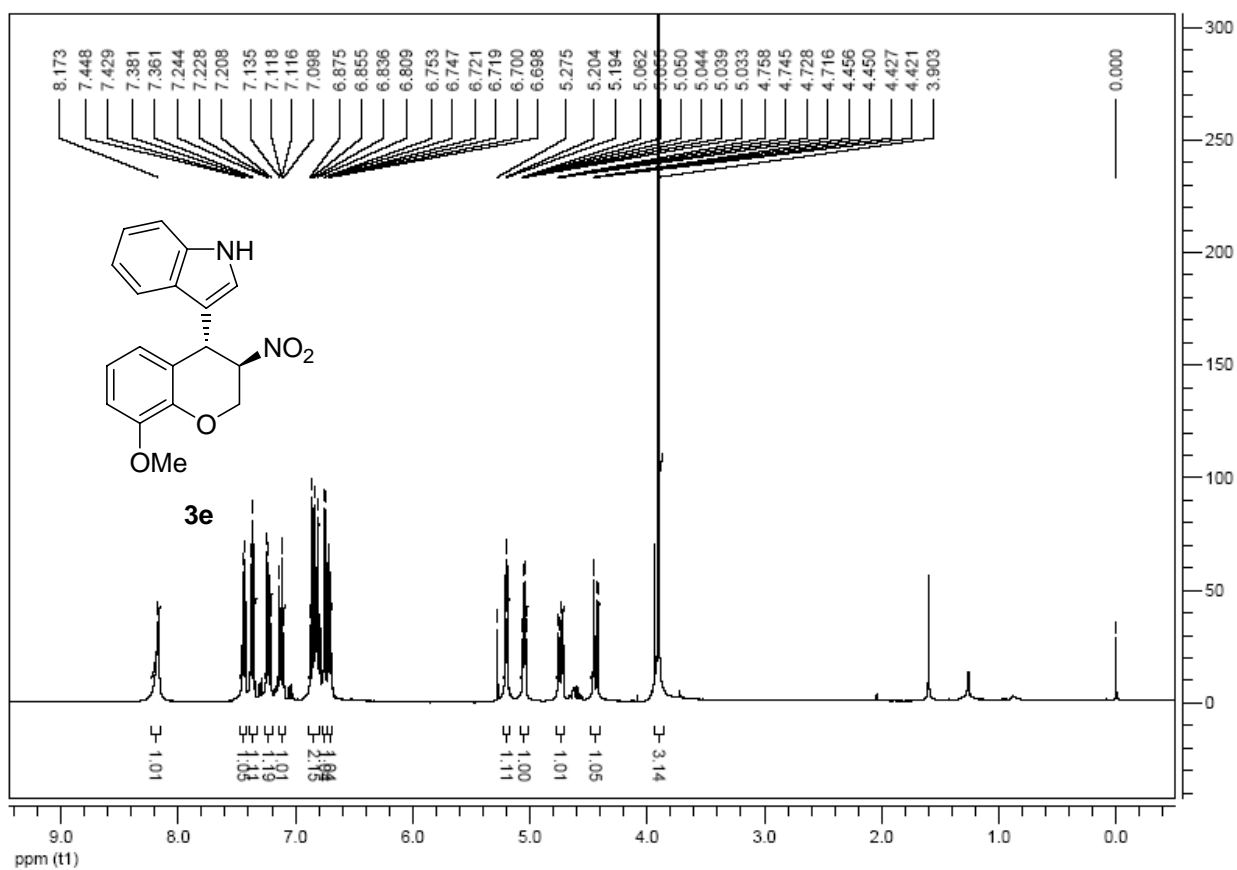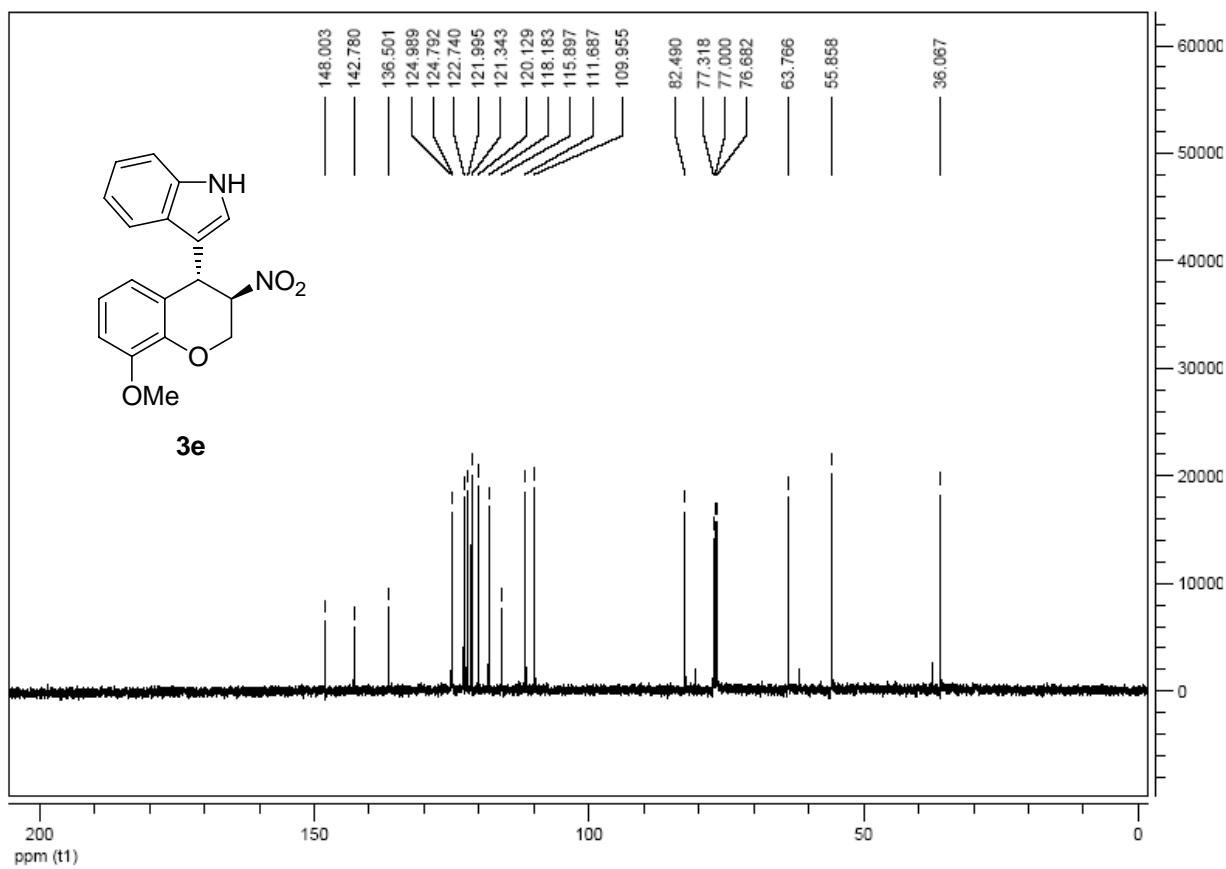

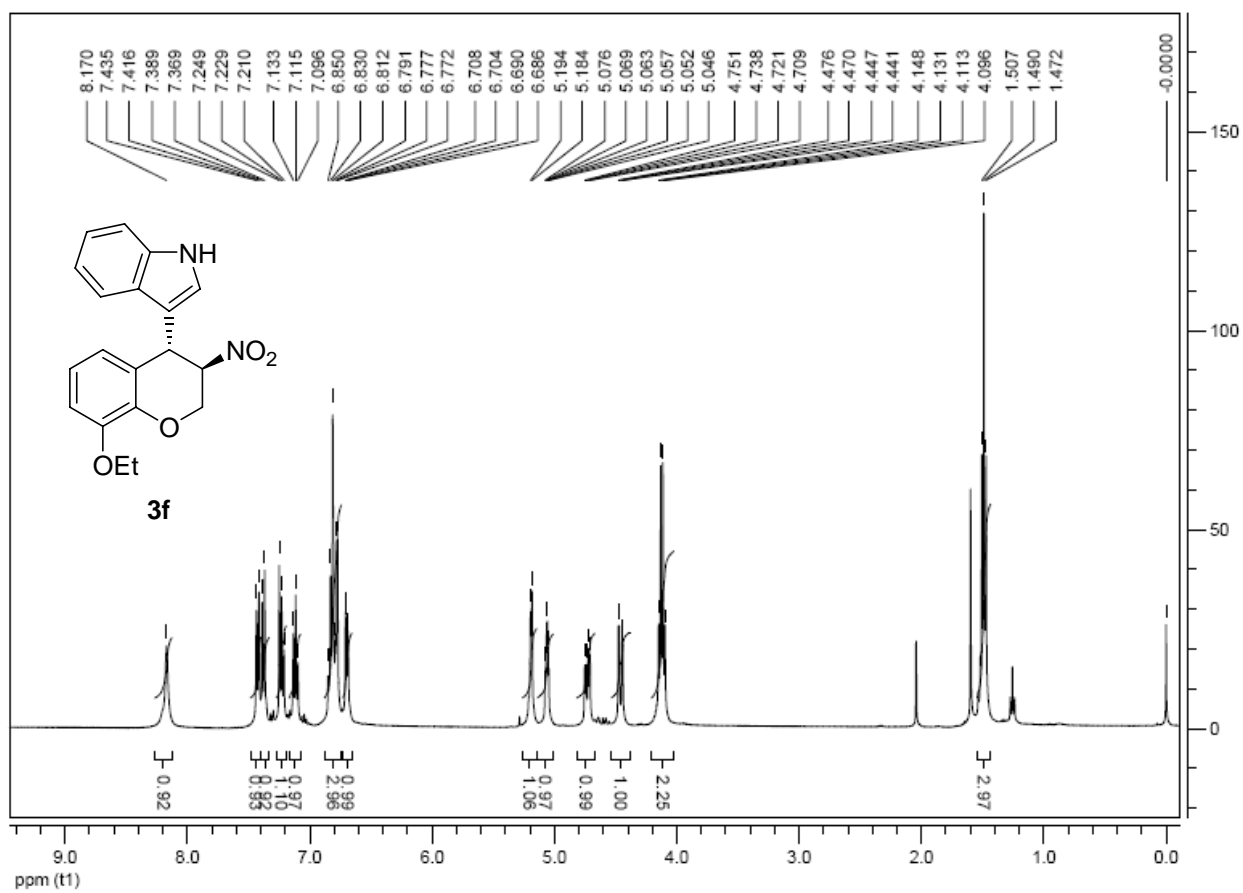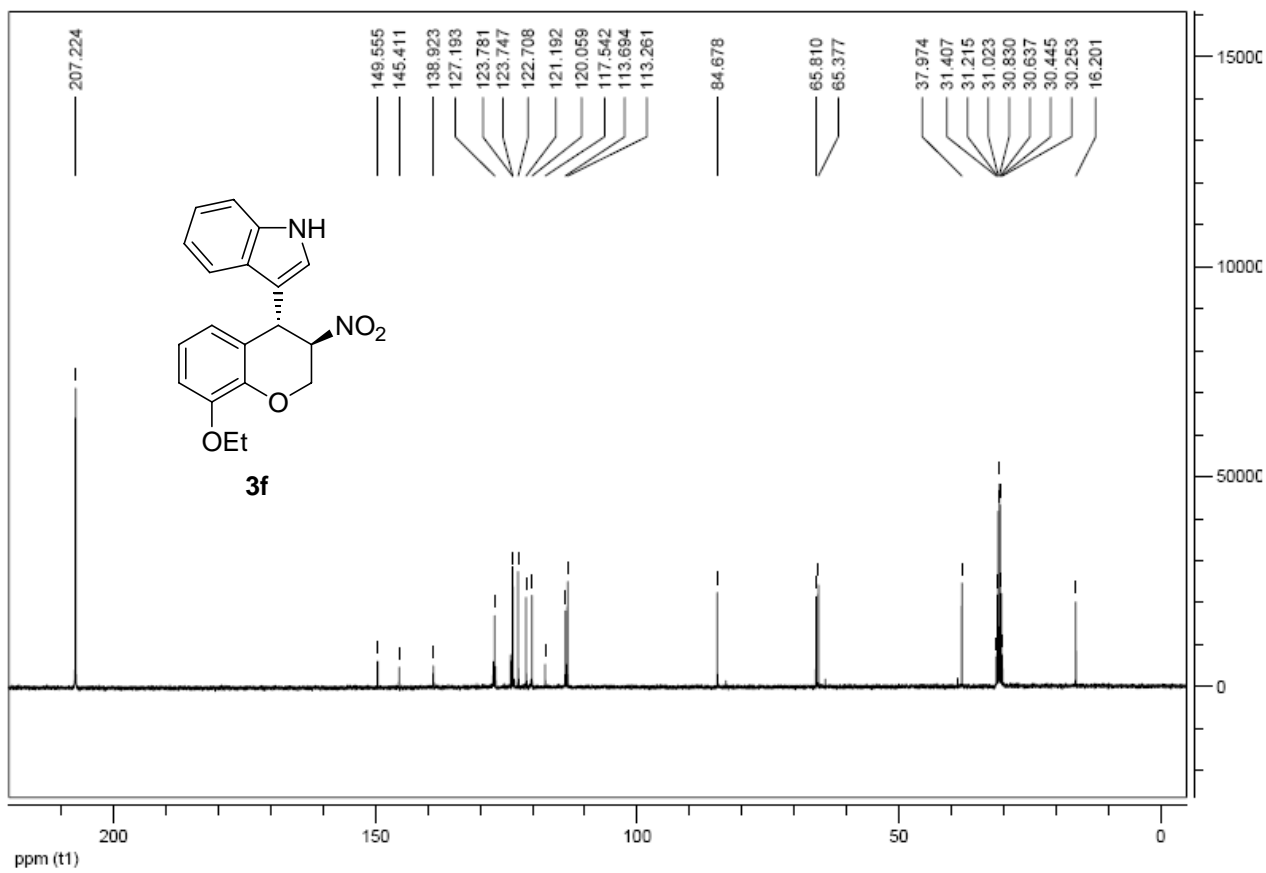

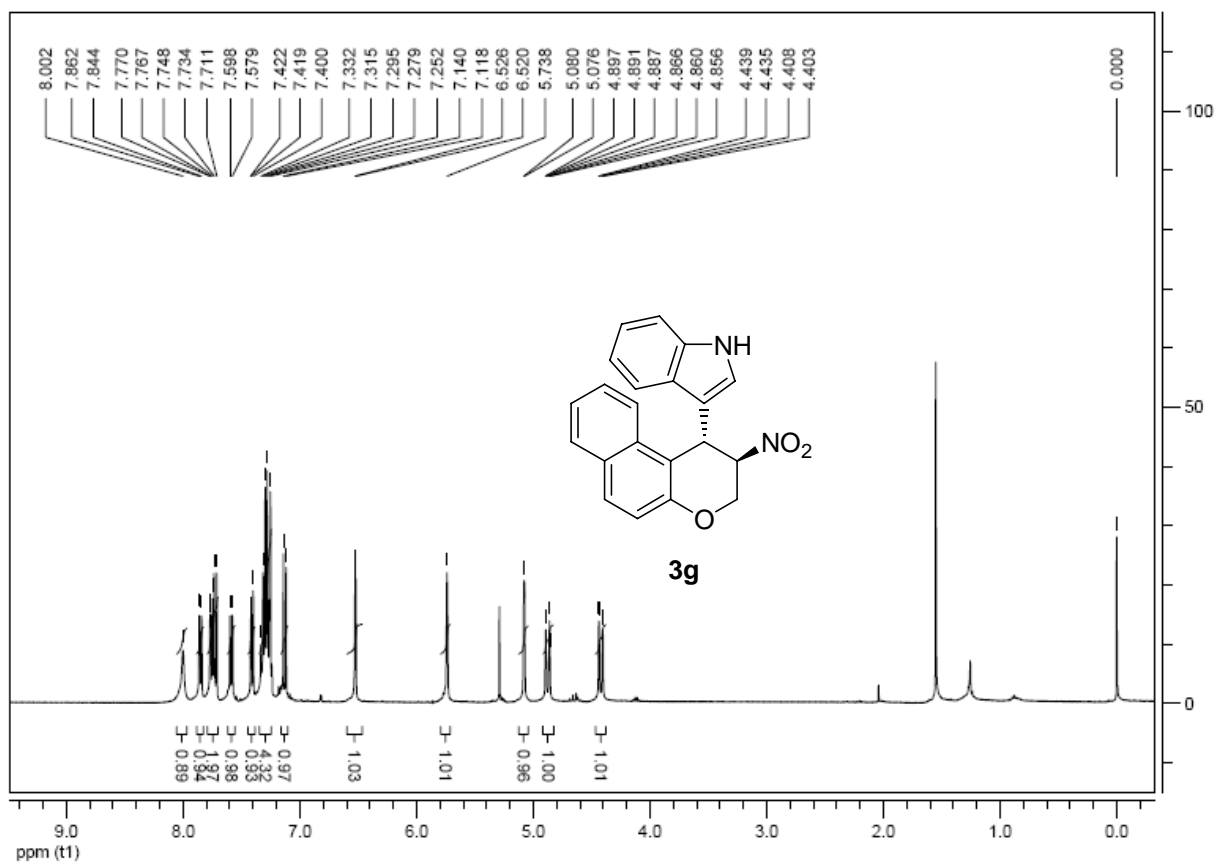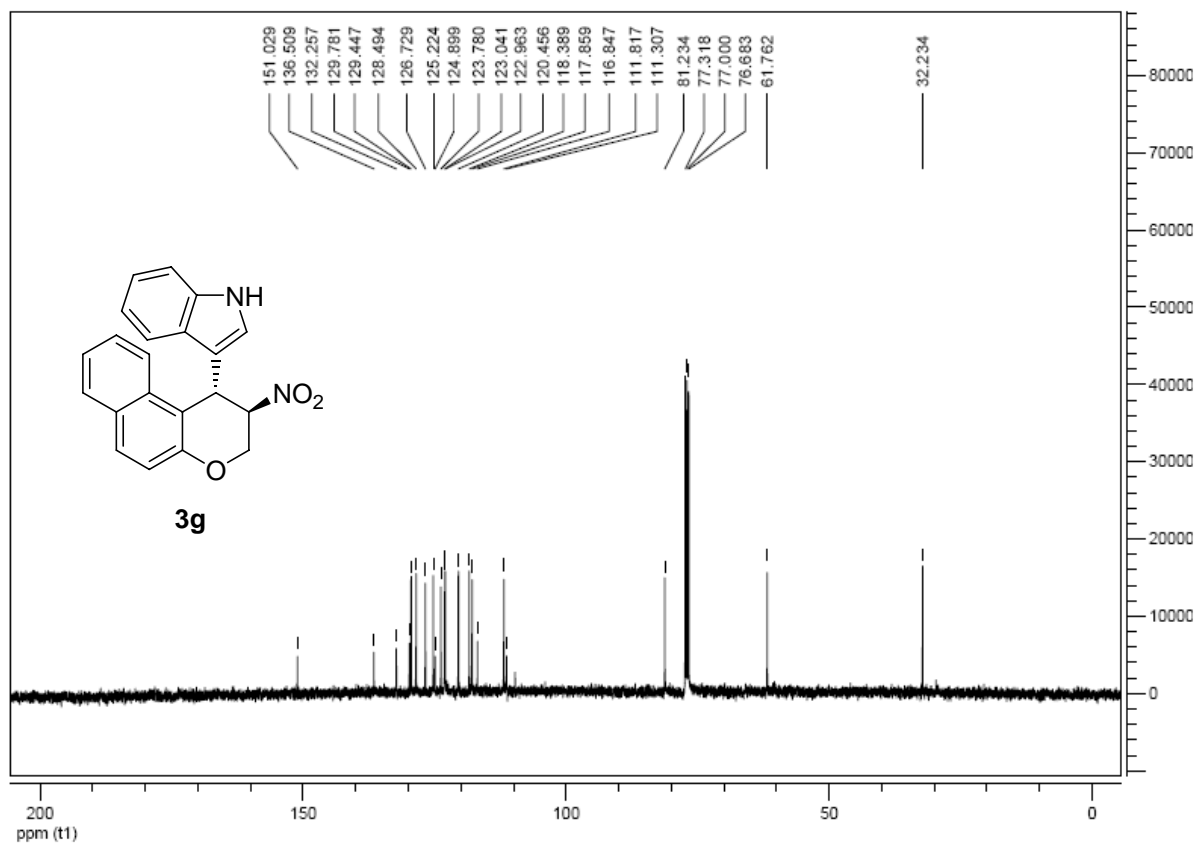



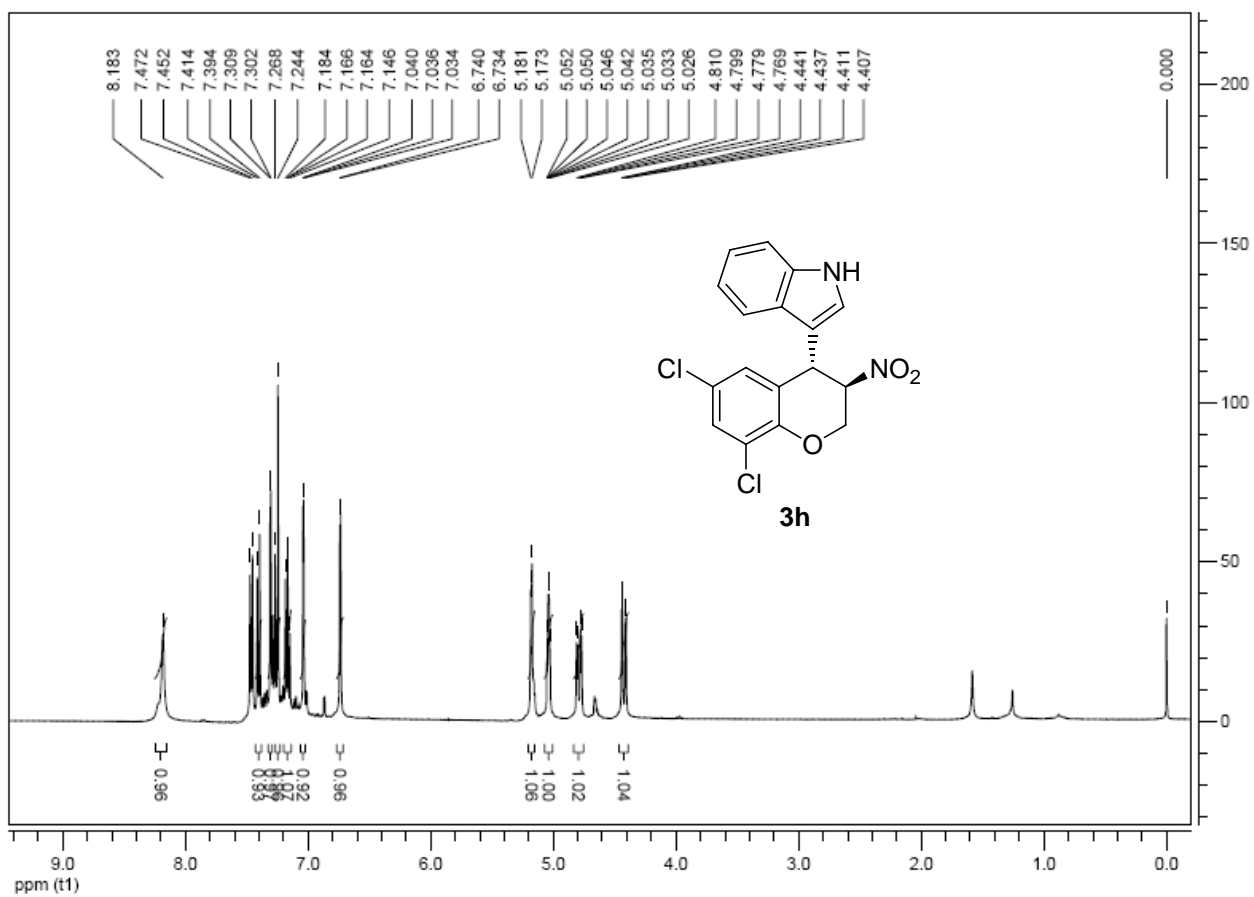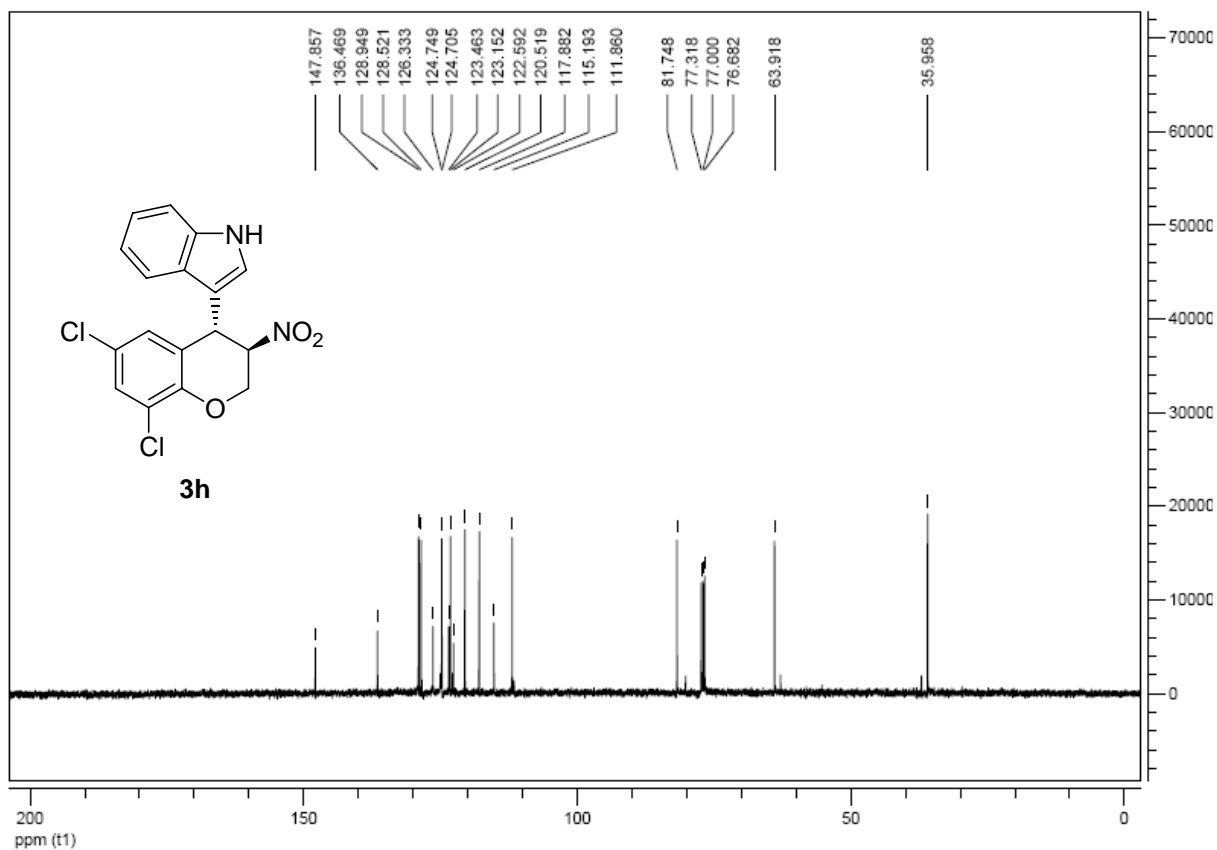

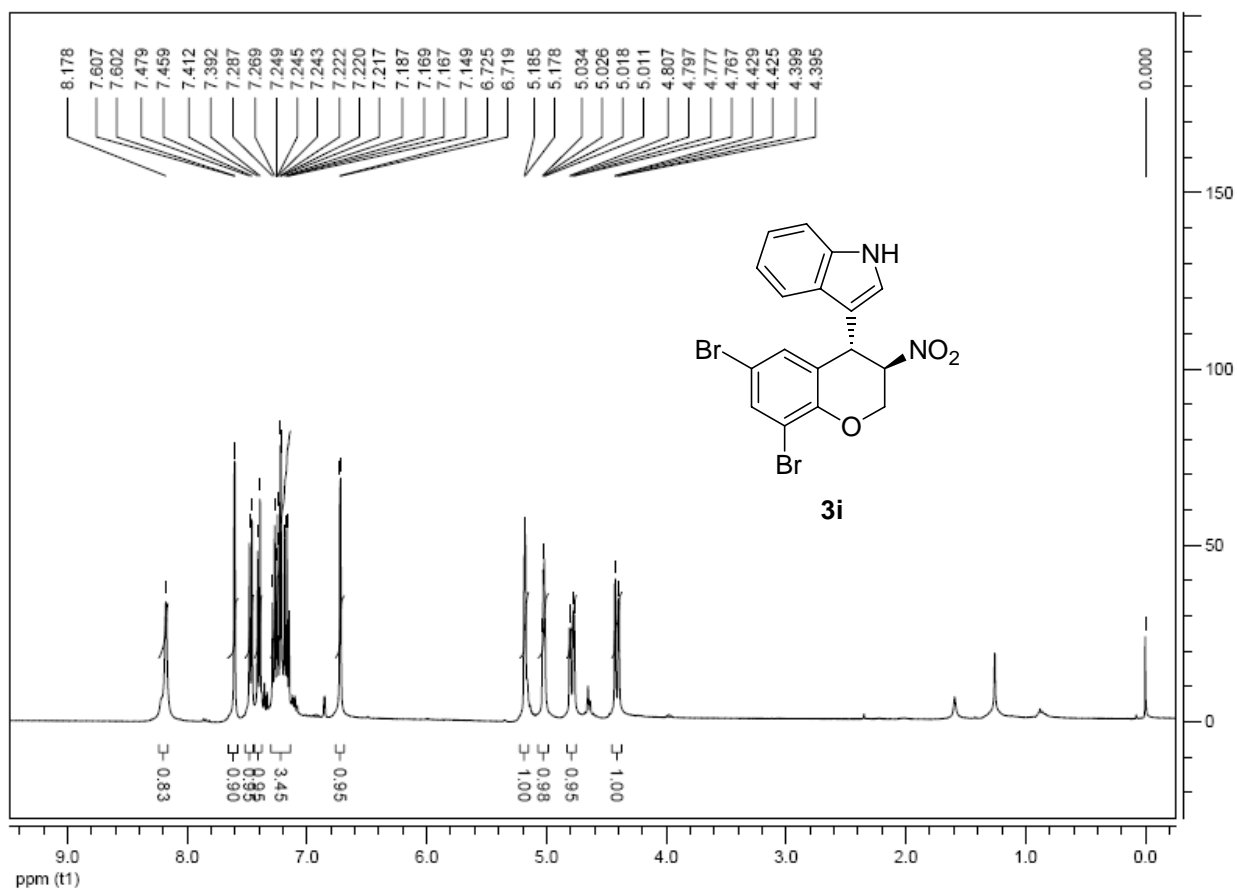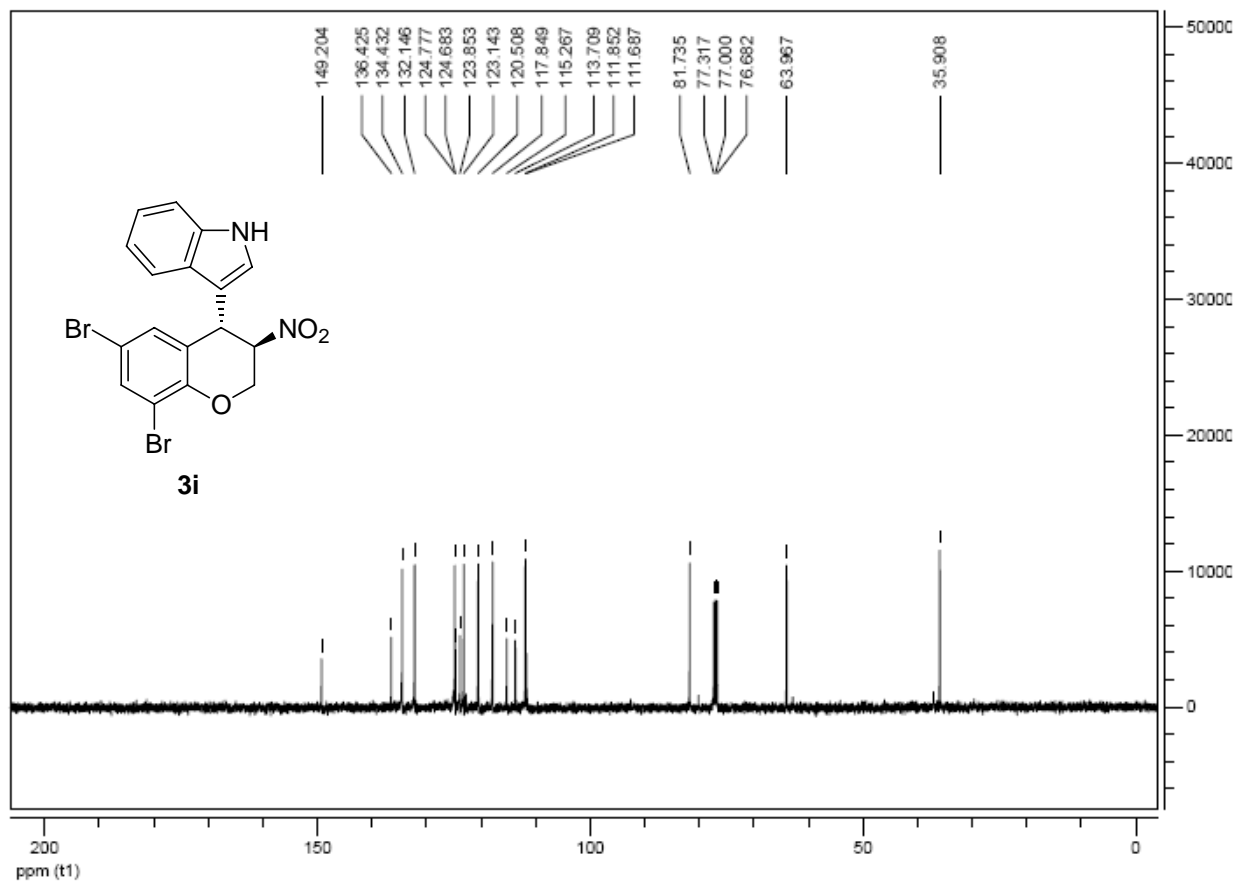

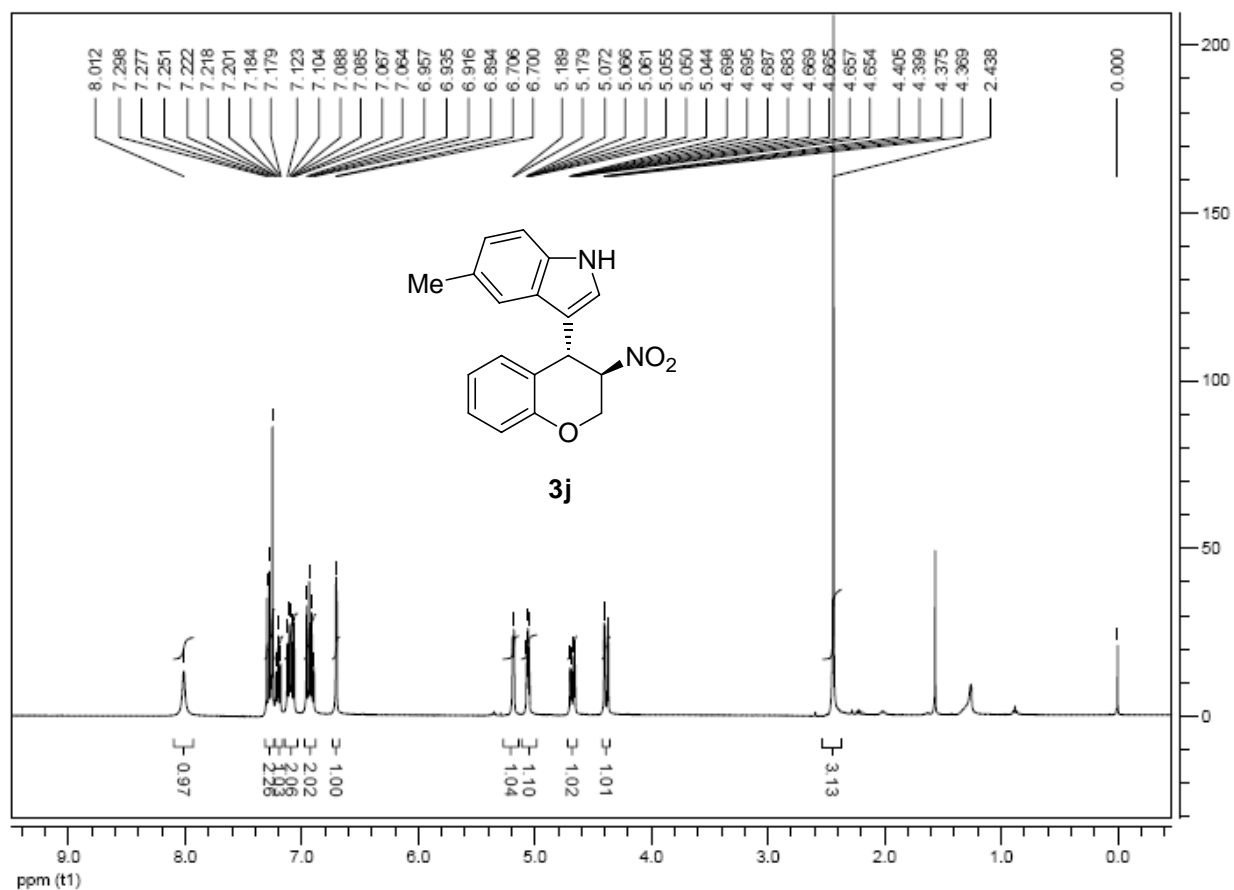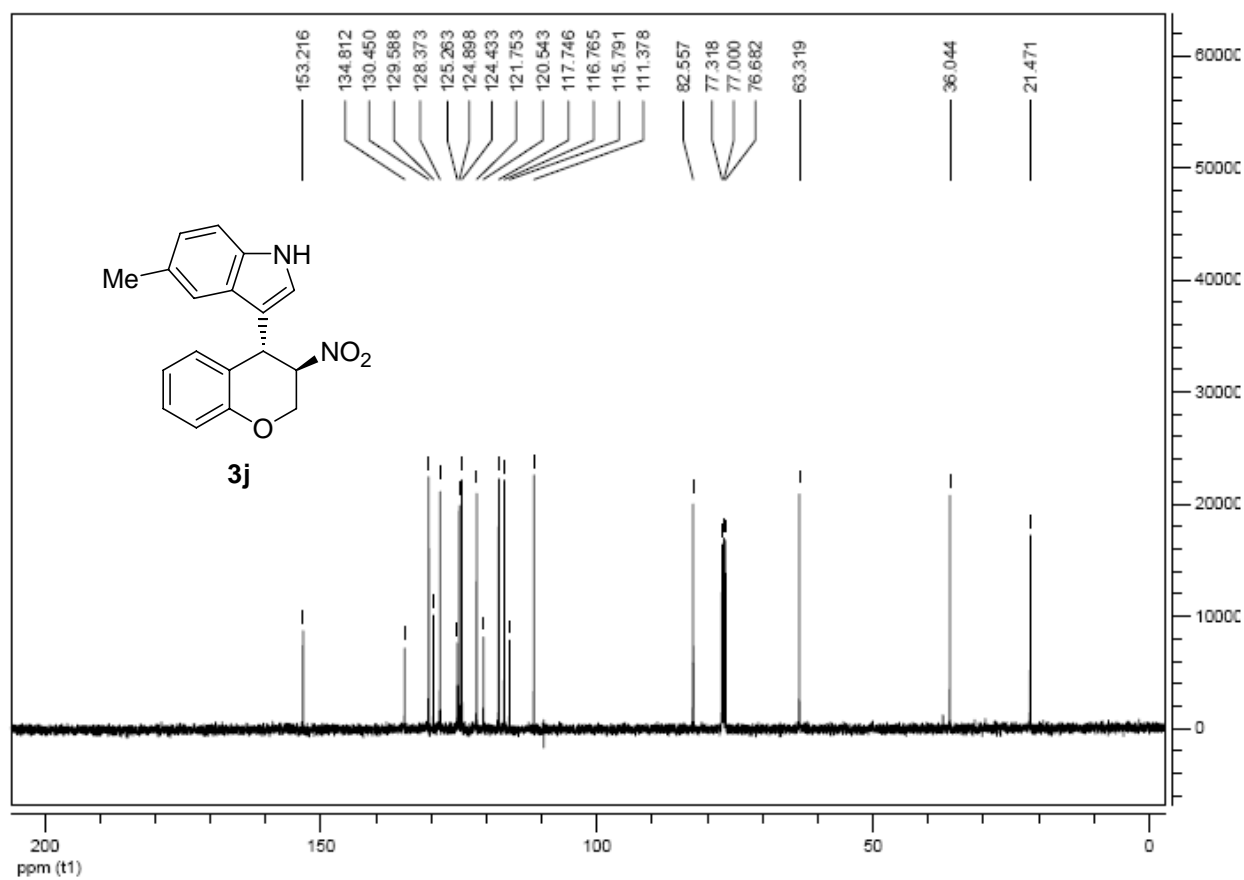

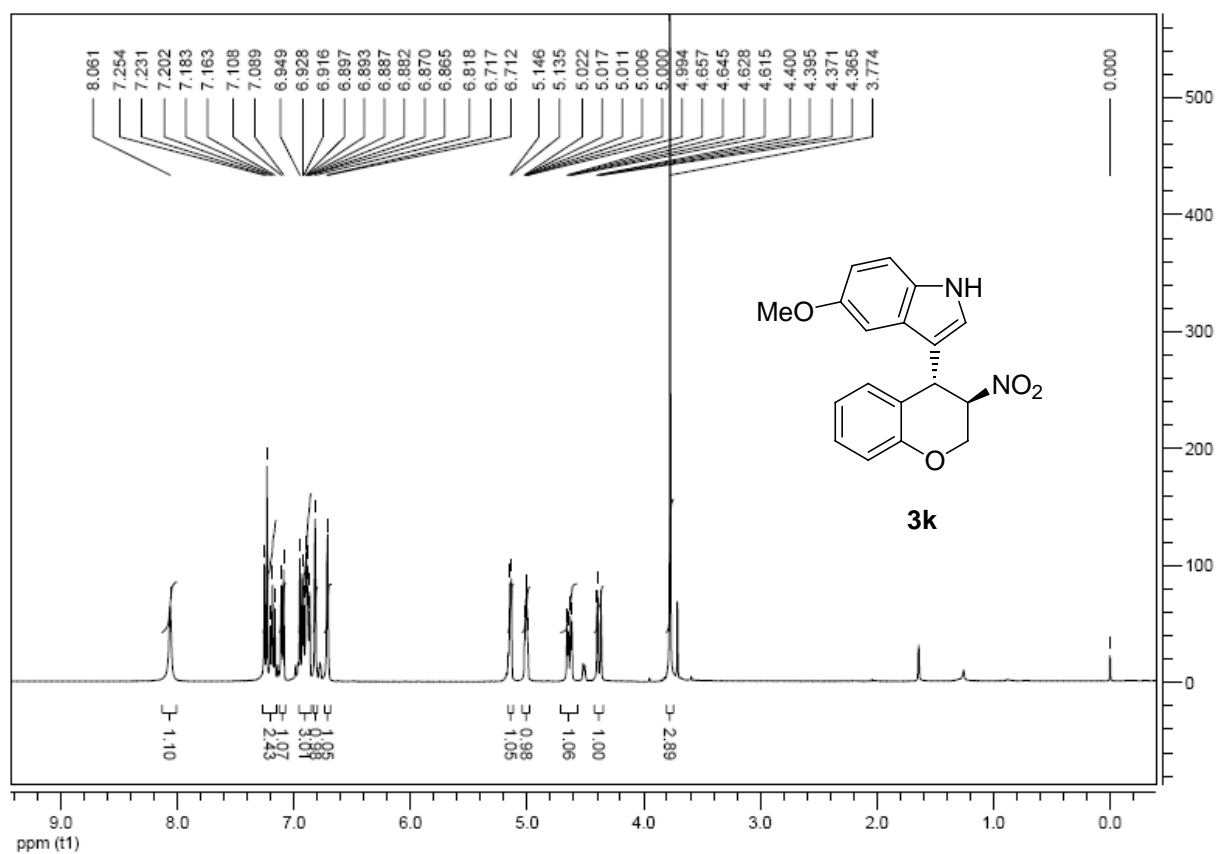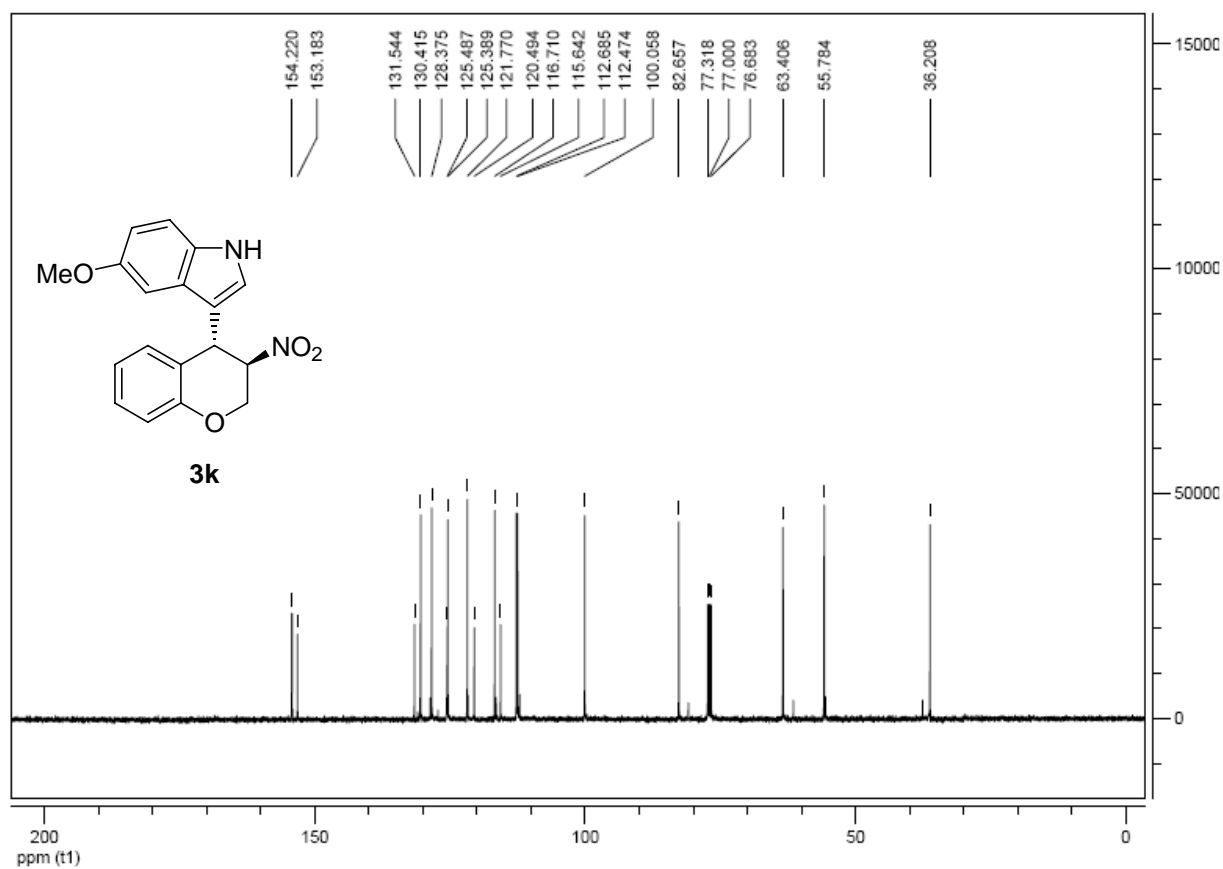

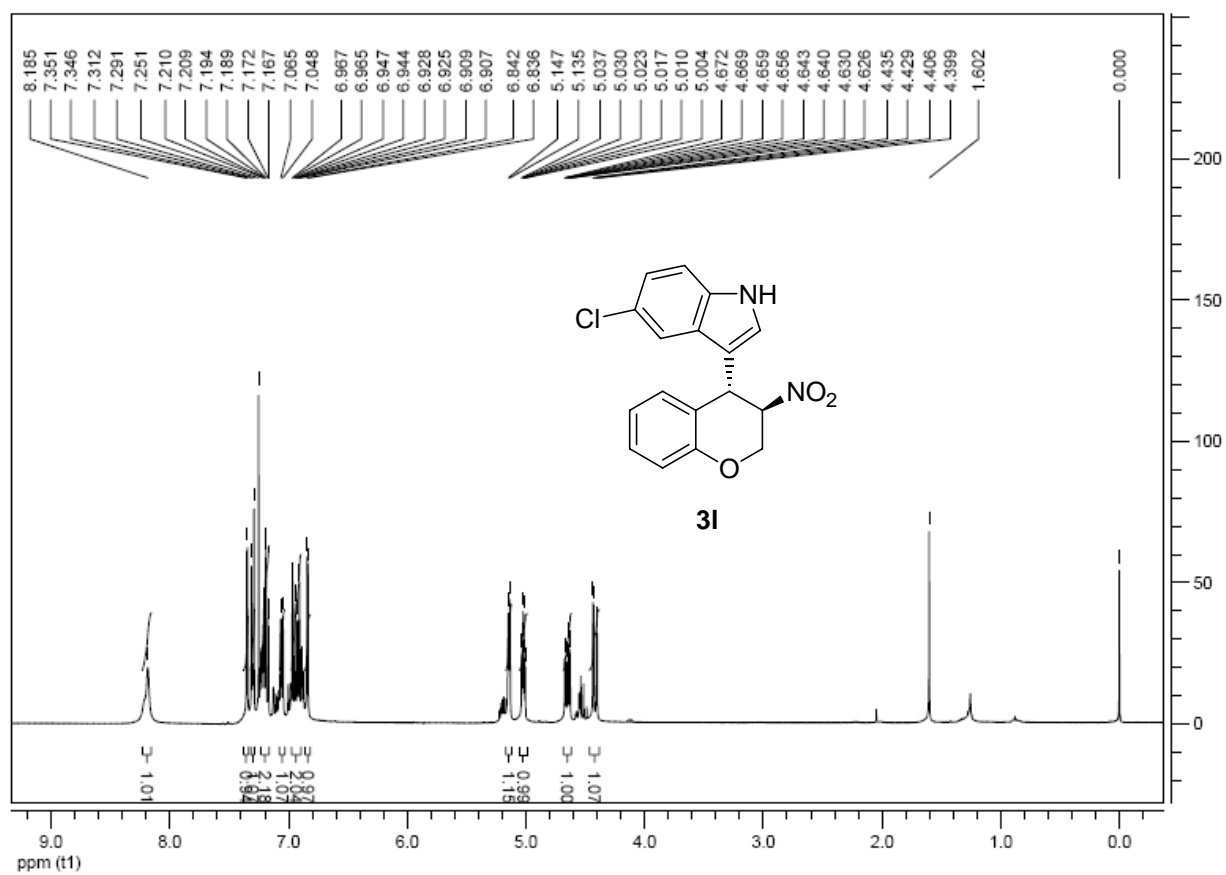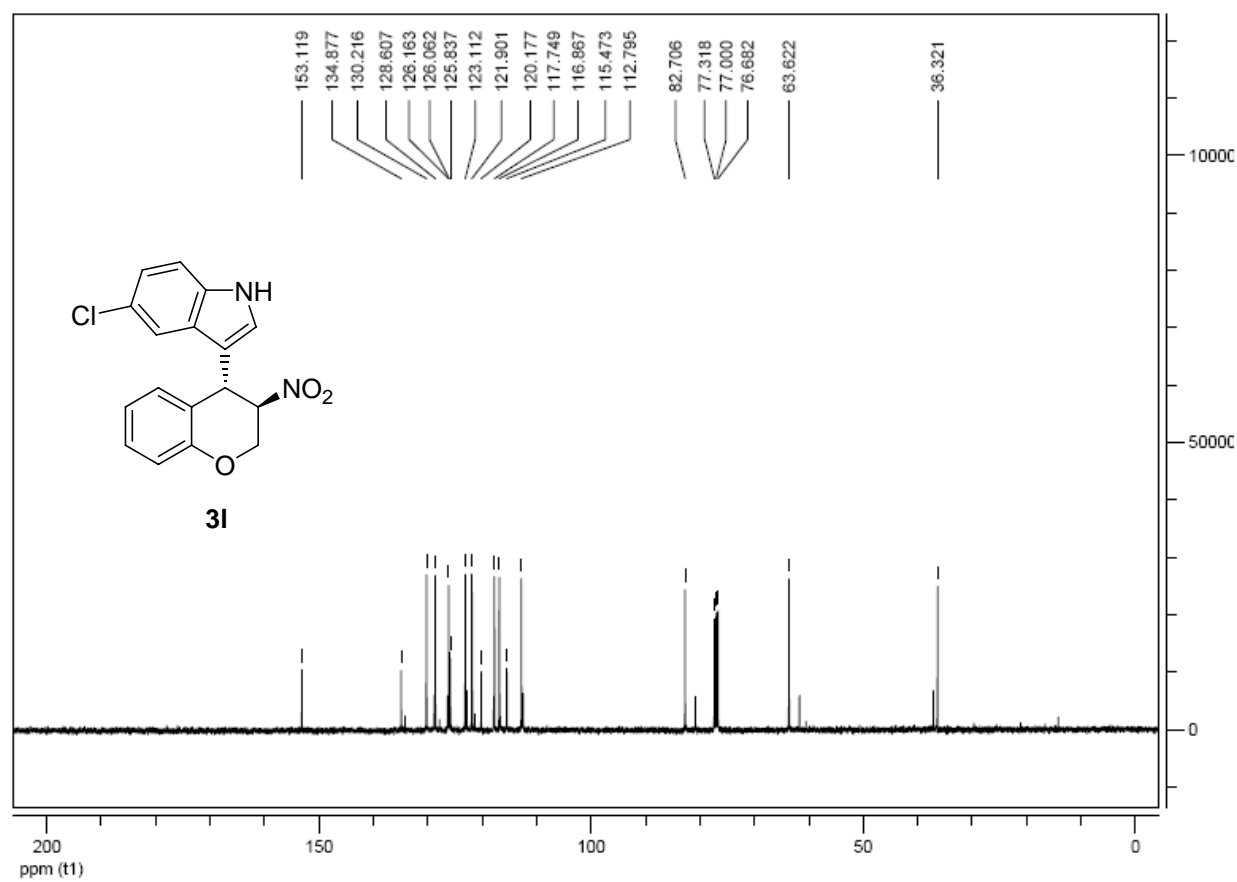

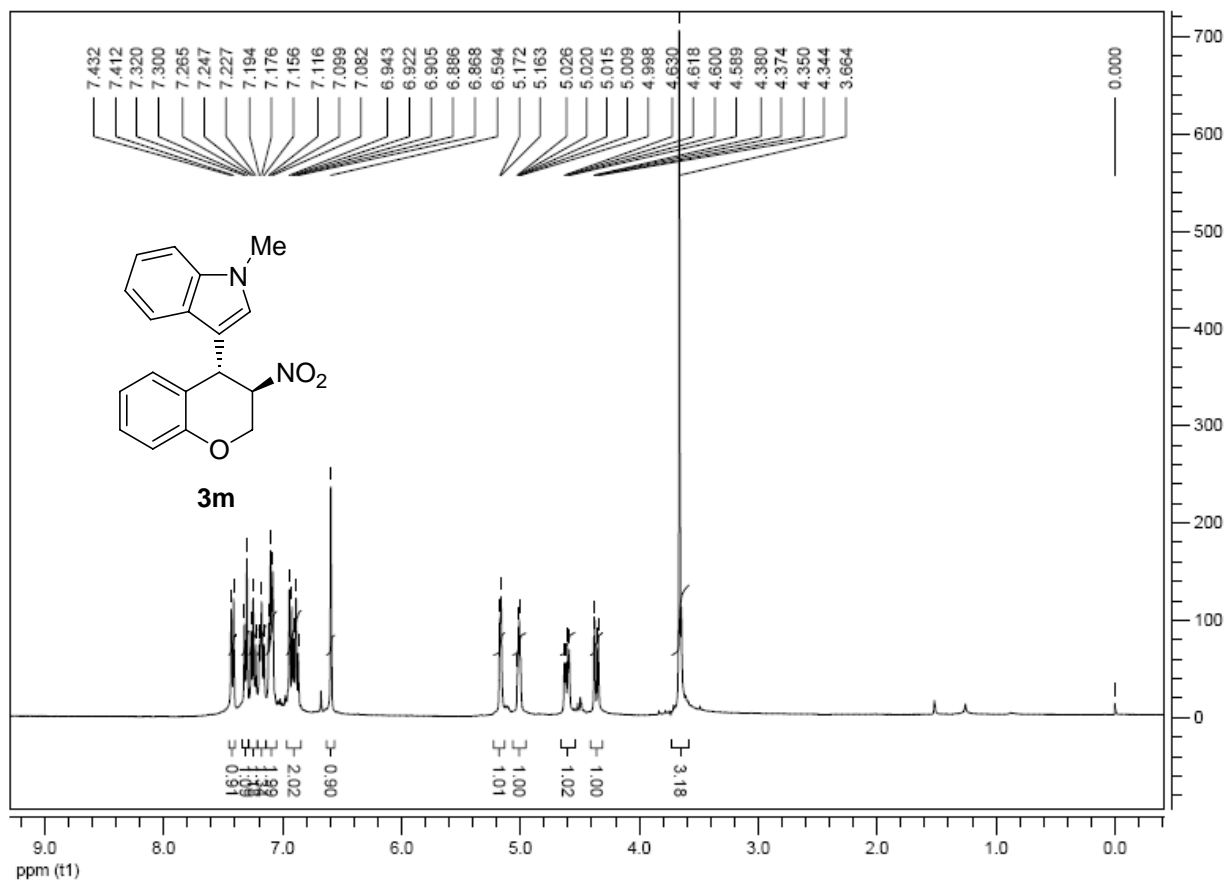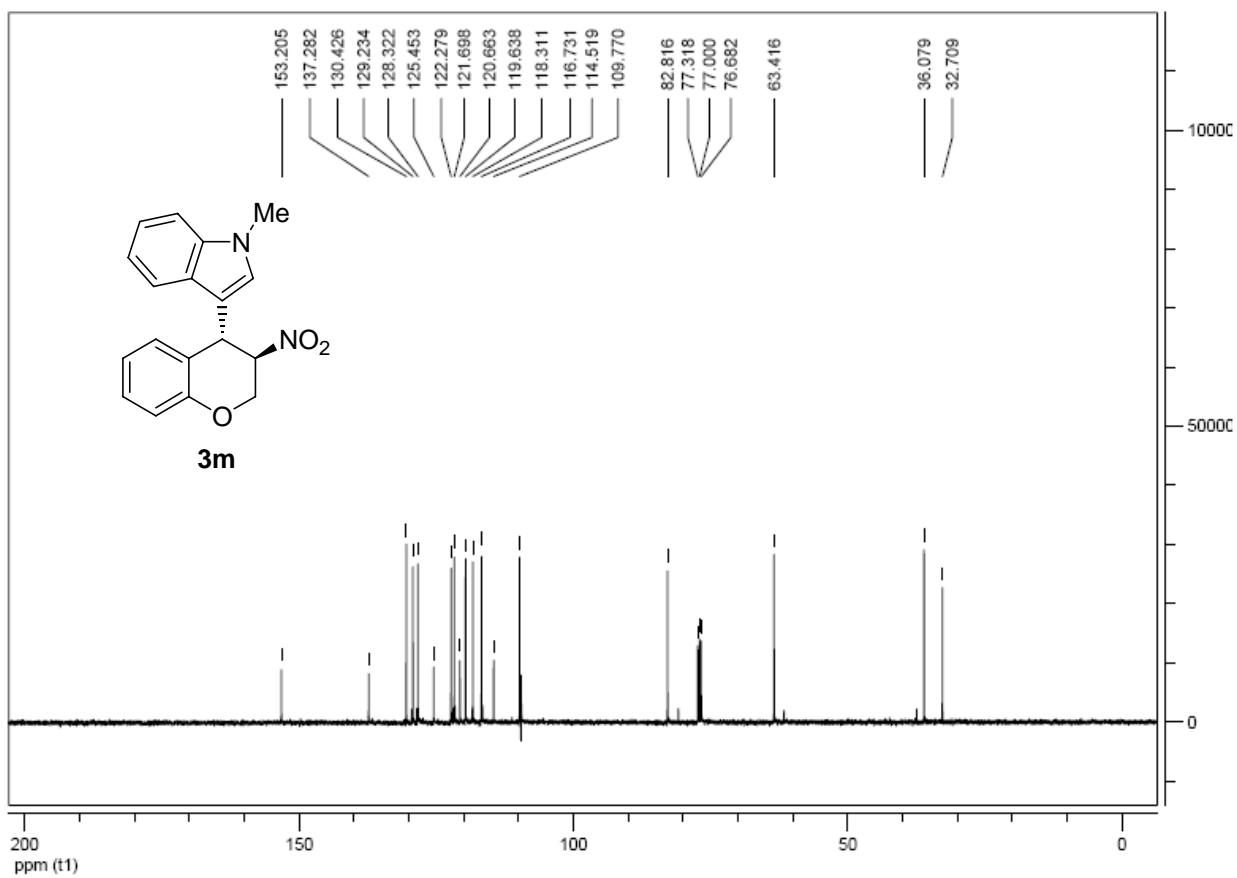

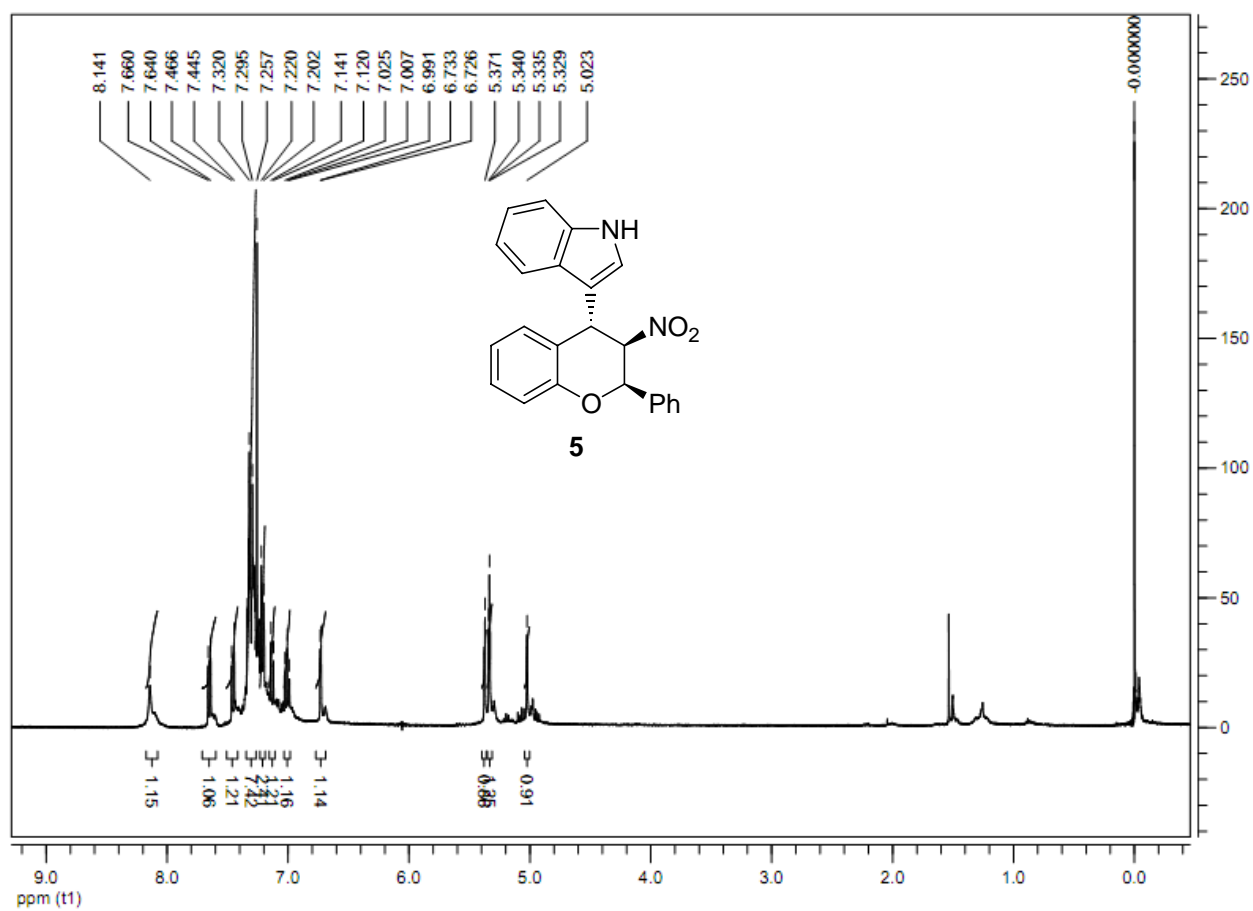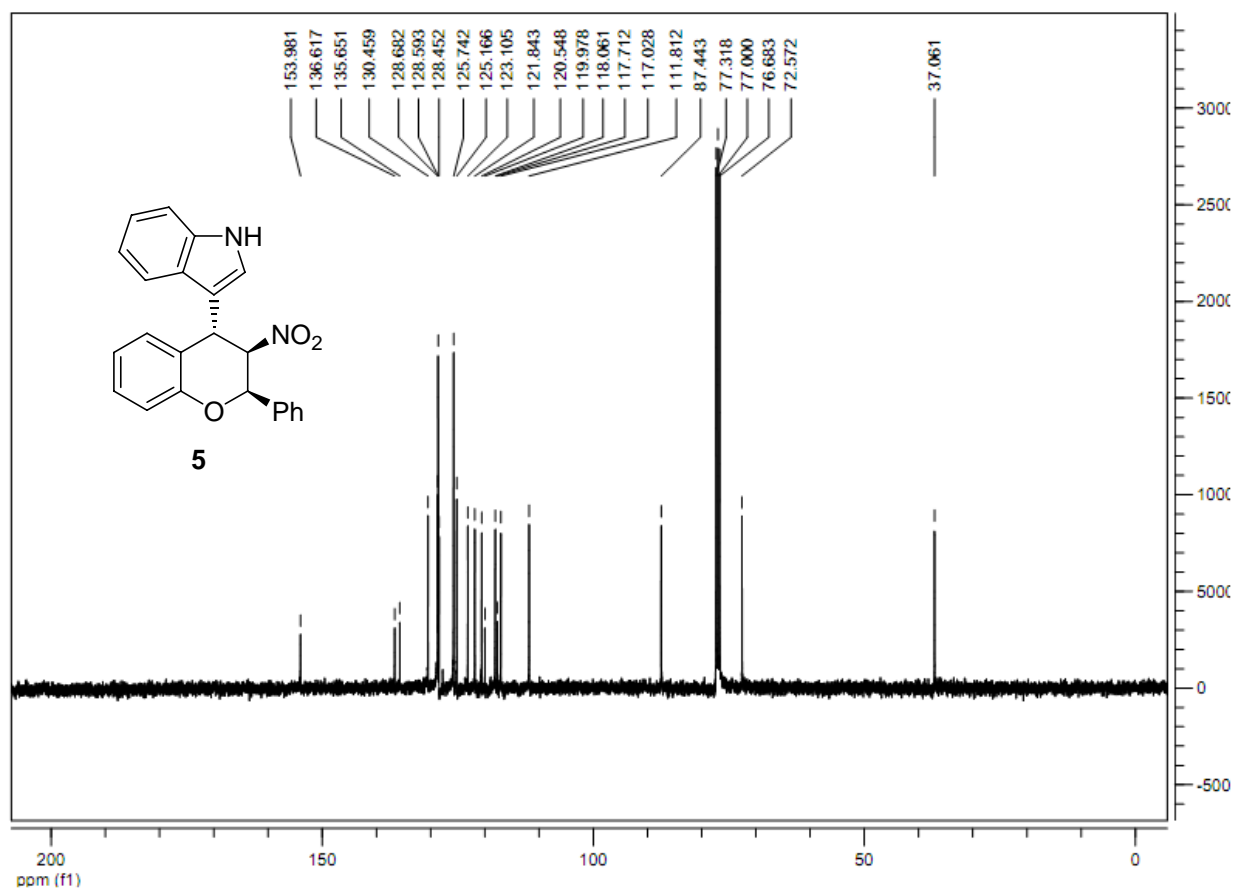

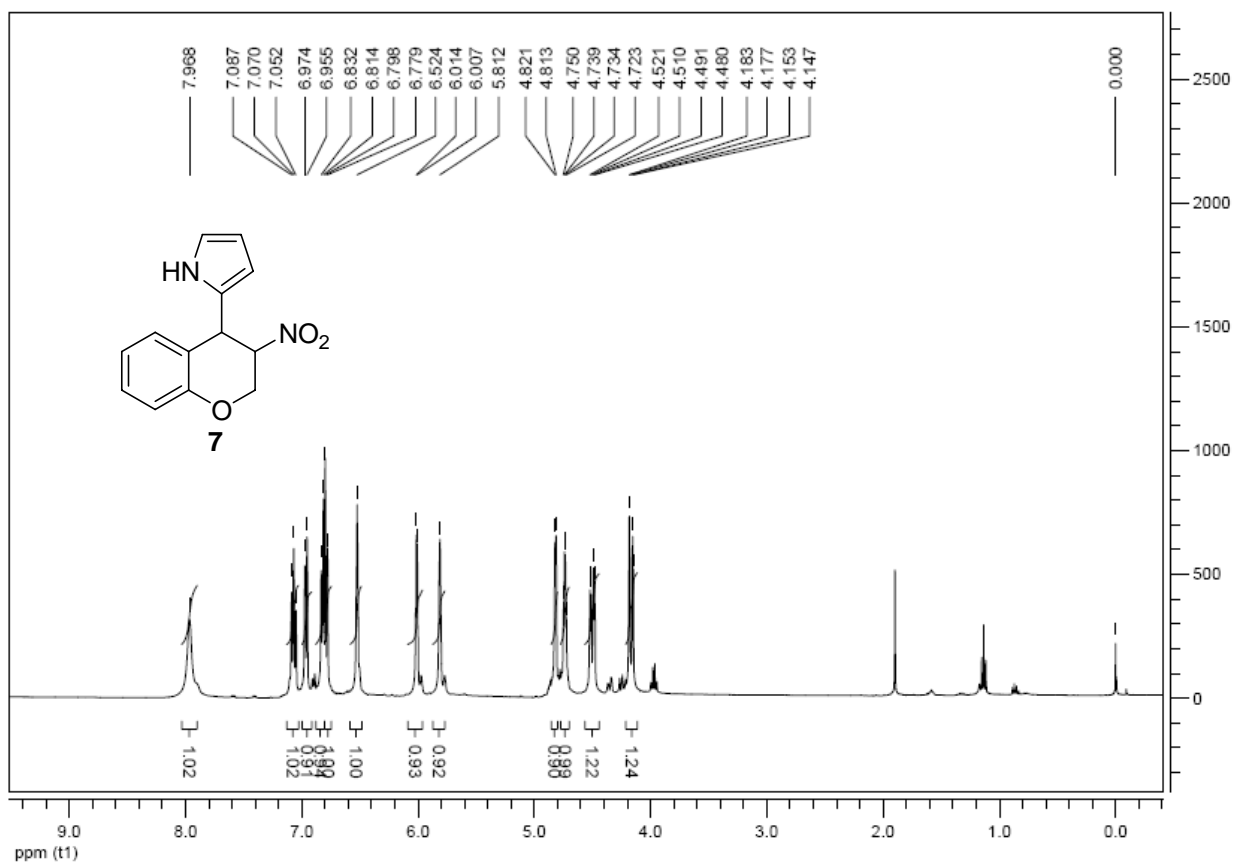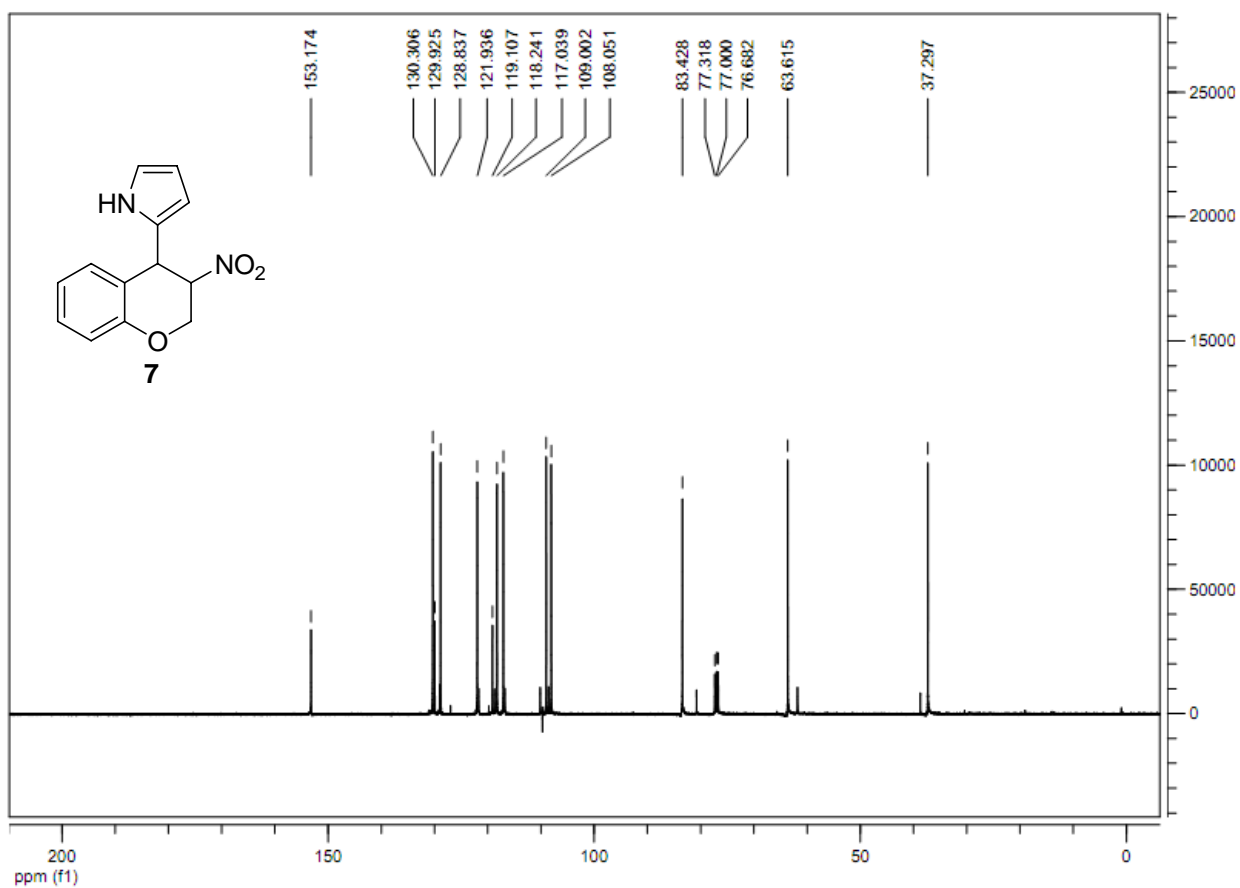



## Copies of HPLC chromatographs of Friedel-Crafts alkylation products

### 3-(3-Nitrochroman-4-yl)-1H-indole (3a):

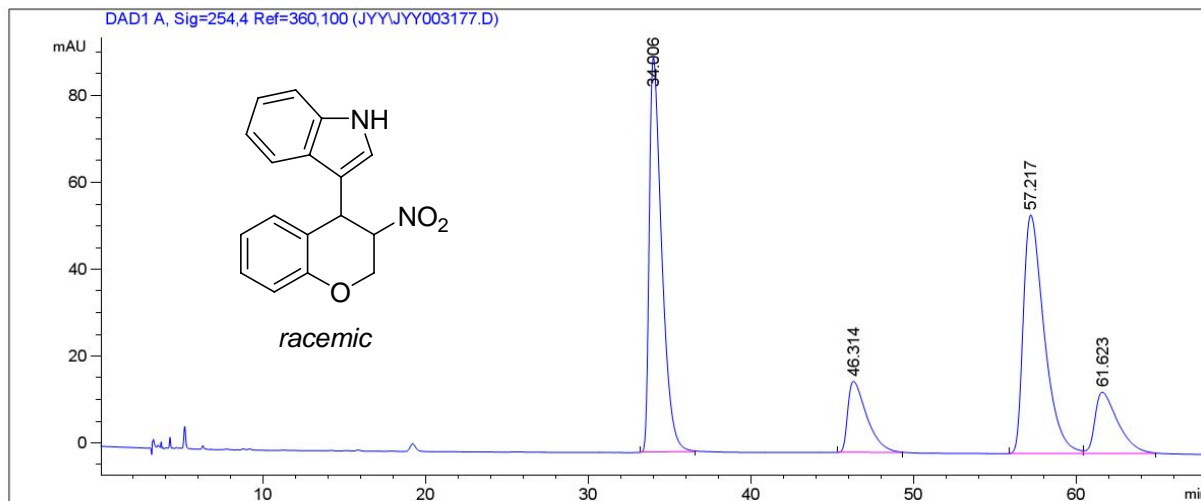

| Peak # | RetTime [min] | Type | Width [min] | Area [mAU*s] | Height [mAU] | Area %  |
|--------|---------------|------|-------------|--------------|--------------|---------|
| 1      | 34.006        | BB   | 0.8022      | 4848.97607   | 90.91963     | 38.8691 |
| 2      | 46.314        | BB   | 1.1567      | 1339.30640   | 16.40113     | 10.7358 |
| 3      | 57.217        | BB   | 1.3156      | 4897.42041   | 54.96202     | 39.2575 |
| 4      | 61.623        | BB   | 1.3711      | 1389.42688   | 14.13070     | 11.1376 |

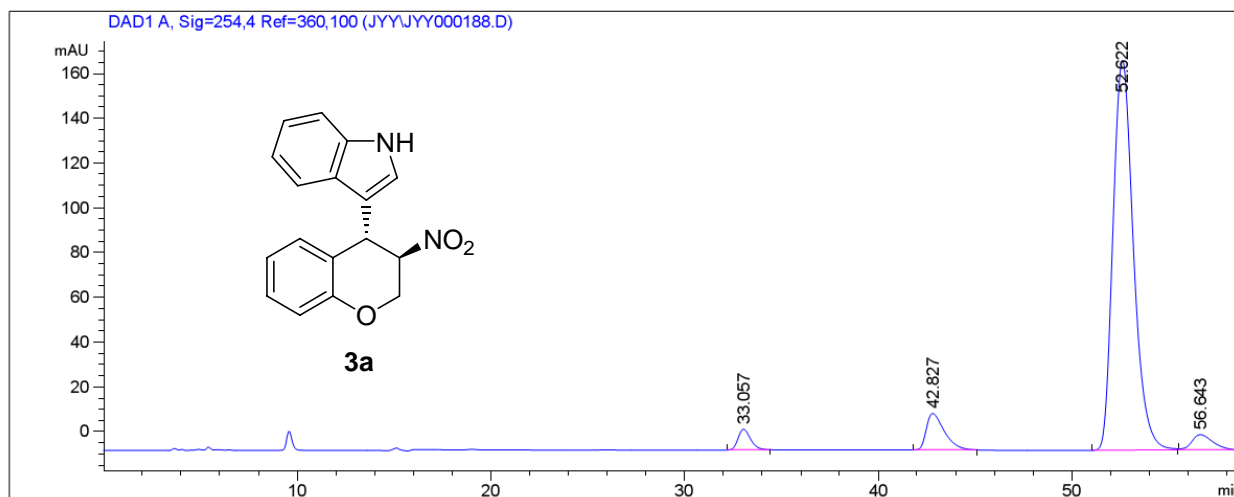

| Peak # | RetTime [min] | Type | Width [min] | Area [mAU*s] | Height [mAU] | Area %  |
|--------|---------------|------|-------------|--------------|--------------|---------|
| 1      | 33.057        | BB   | 0.6966      | 420.74823    | 9.28602      | 2.8455  |
| 2      | 42.827        | BB   | 0.9950      | 1062.65344   | 16.33426     | 7.1866  |
| 3      | 52.622        | BB   | 1.1430      | 1.27623e4    | 174.14287    | 86.3097 |
| 4      | 56.643        | BB   | 1.1229      | 540.93036    | 6.95878      | 3.6582  |

**3-(6-Chloro-3-nitrochroman-4-yl)-1H-indole (3b):**

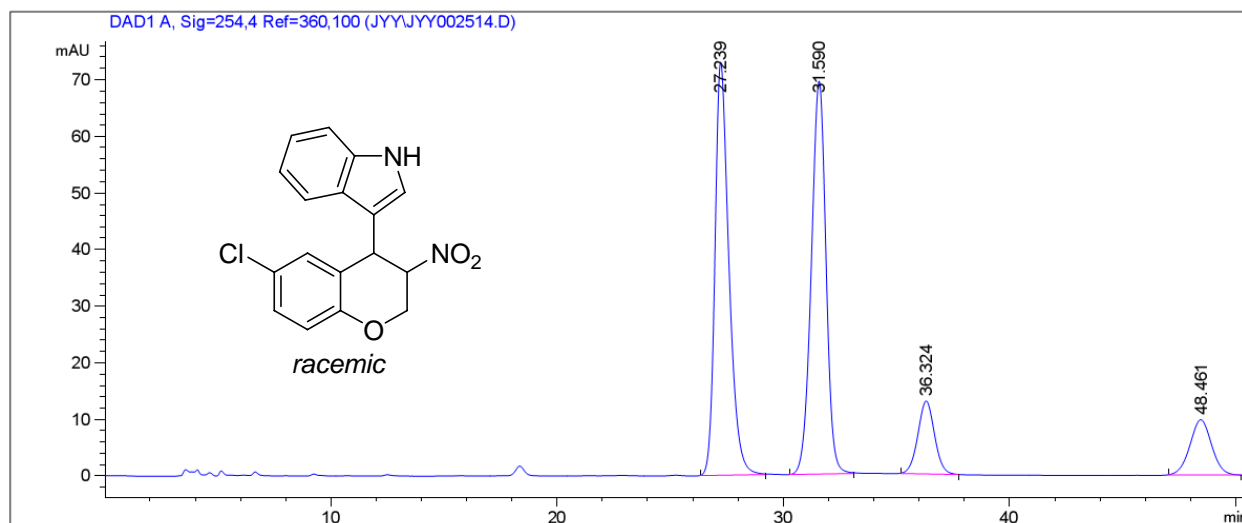

| Peak # | RetTime [min] | Type | Width [min] | Area [mAU*s] | Height [mAU] | Area %  |
|--------|---------------|------|-------------|--------------|--------------|---------|
| 1      | 27.239        | BB   | 0.6486      | 3133.45581   | 73.02897     | 41.2850 |
| 2      | 31.590        | BB   | 0.6979      | 3130.31226   | 69.44391     | 41.2436 |
| 3      | 36.324        | BB   | 0.7886      | 665.46368    | 12.92755     | 8.7679  |
| 4      | 48.461        | BB   | 0.9967      | 660.57928    | 9.82122      | 8.7035  |

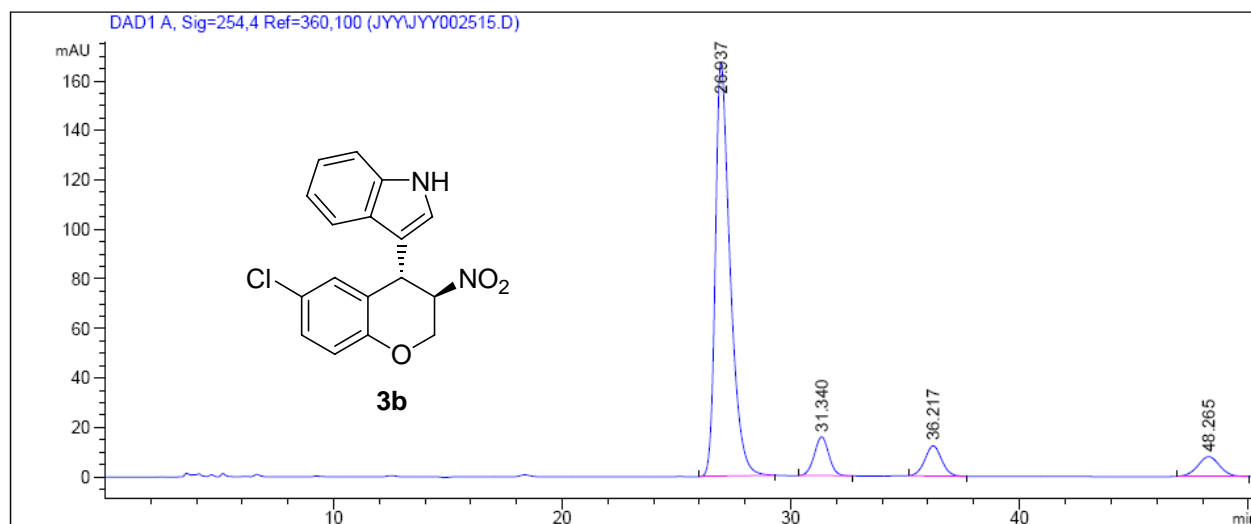

| Peak # | RetTime [min] | Type | Width [min] | Area [mAU*s] | Height [mAU] | Area %  |
|--------|---------------|------|-------------|--------------|--------------|---------|
| 1      | 26.937        | BB   | 0.6686      | 7524.30078   | 167.32423    | 80.0511 |
| 2      | 31.340        | BB   | 0.6921      | 701.46667    | 15.73475     | 7.4629  |
| 3      | 36.217        | BB   | 0.7938      | 629.72754    | 12.20845     | 6.6997  |
| 4      | 48.265        | BB   | 1.0350      | 543.87762    | 8.06236      | 5.7863  |

**3-(6-Bromo-3-nitrochroman-4-yl)-1H-indole (3c):**

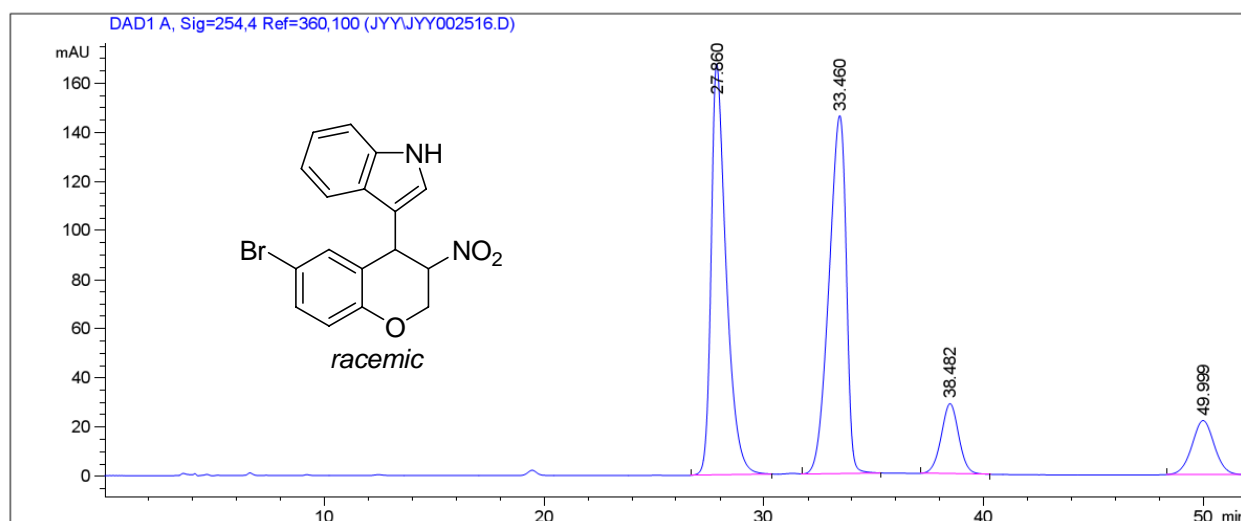

| Peak # | RetTime [min] | Type | Width [min] | Area [mAU*s] | Height [mAU] | Area %  |
|--------|---------------|------|-------------|--------------|--------------|---------|
| 1      | 27.860        | BB   | 0.7053      | 8001.60498   | 167.50771    | 41.7830 |
| 2      | 33.460        | VB   | 0.8531      | 7963.70801   | 145.83302    | 41.5852 |
| 3      | 38.482        | BB   | 0.8602      | 1599.41138   | 28.61124     | 8.3519  |
| 4      | 49.999        | BBA  | 1.0919      | 1585.63904   | 22.13124     | 8.2799  |

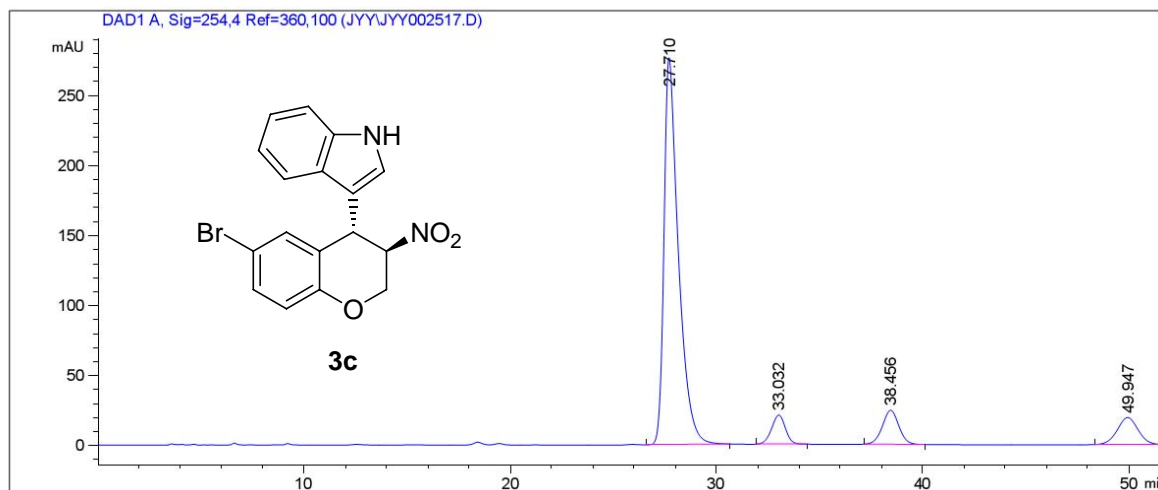

| Peak # | RetTime [min] | Type | Width [min] | Area [mAU*s] | Height [mAU] | Area %  |
|--------|---------------|------|-------------|--------------|--------------|---------|
| 1      | 27.710        | VB   | 0.7072      | 1.34345e4    | 276.34045    | 78.3067 |
| 2      | 33.032        | BB   | 0.7242      | 978.51996    | 20.82624     | 5.7036  |
| 3      | 38.456        | BB   | 0.8537      | 1358.65820   | 24.39894     | 7.9193  |
| 4      | 49.947        | BBA  | 1.0919      | 1384.56433   | 19.41683     | 8.0703  |

**3-(6-Nitro-3-nitrochroman-4-yl)-1H-indole (3d):**

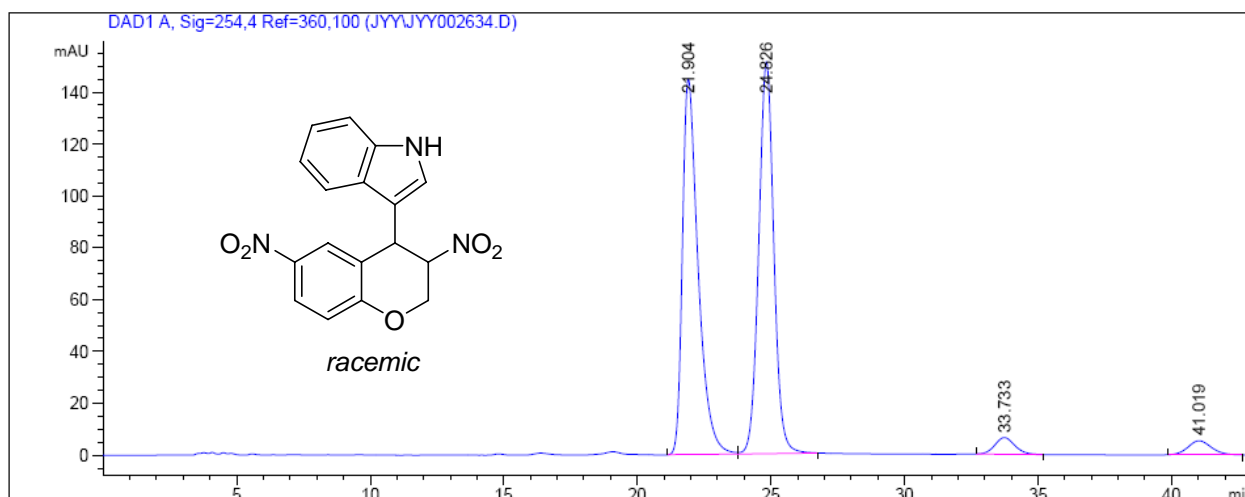

| Peak # | RetTime [min] | Type | Width [min] | Area [mAU*s] | Height [mAU] | Area %  |
|--------|---------------|------|-------------|--------------|--------------|---------|
| 1      | 21.904        | BV   | 0.6136      | 5930.48633   | 144.88113    | 47.1688 |
| 2      | 24.826        | VB   | 0.6040      | 5965.02246   | 151.30112    | 47.4435 |
| 3      | 33.733        | BB   | 0.8121      | 340.92978    | 6.49810      | 2.7116  |
| 4      | 41.019        | BB   | 0.9393      | 336.46768    | 5.45699      | 2.6761  |

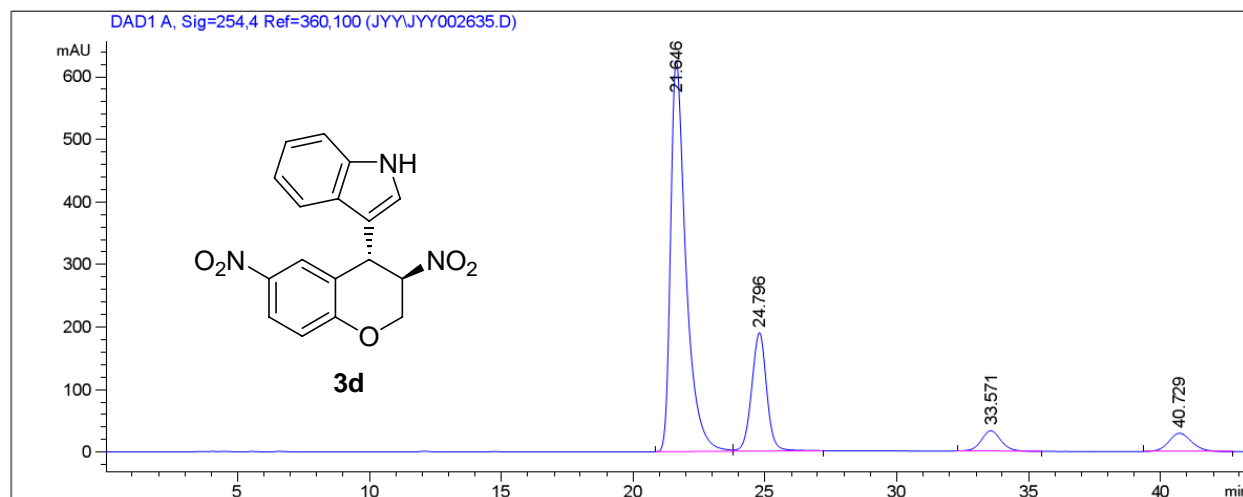

| Peak # | RetTime [min] | Type | Width [min] | Area [mAU*s] | Height [mAU] | Area %  |
|--------|---------------|------|-------------|--------------|--------------|---------|
| 1      | 21.646        | BV   | 0.6038      | 2.53002e4    | 625.58032    | 69.5994 |
| 2      | 24.796        | VB   | 0.6079      | 7537.58740   | 189.54581    | 20.7355 |
| 3      | 33.571        | BB   | 0.7980      | 1711.67920   | 32.73924     | 4.7087  |
| 4      | 40.729        | BB   | 0.9406      | 1801.71387   | 29.33259     | 4.9564  |

### 3-(8-Methoxy-3-nitrochroman-4-yl)-1H-indole (3e)

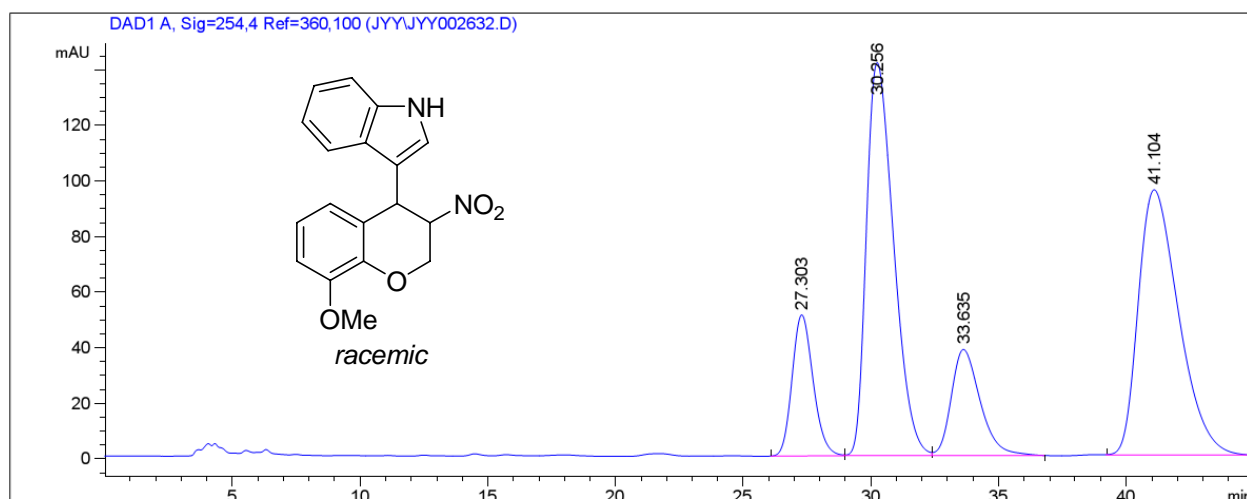

| Peak # | RetTime [min] | Type | Width [min] | Area [mAU*s] | Height [mAU] | Area %  |
|--------|---------------|------|-------------|--------------|--------------|---------|
| 1      | 27.303        | BV   | 0.8899      | 2921.59521   | 50.88382     | 10.8217 |
| 2      | 30.256        | VV   | 1.1570      | 1.05011e4    | 141.62851    | 38.8967 |
| 3      | 33.635        | VB   | 1.1955      | 3033.39795   | 38.32275     | 11.2359 |
| 4      | 41.104        | BBA  | 1.6807      | 1.05413e4    | 95.72607     | 39.0457 |

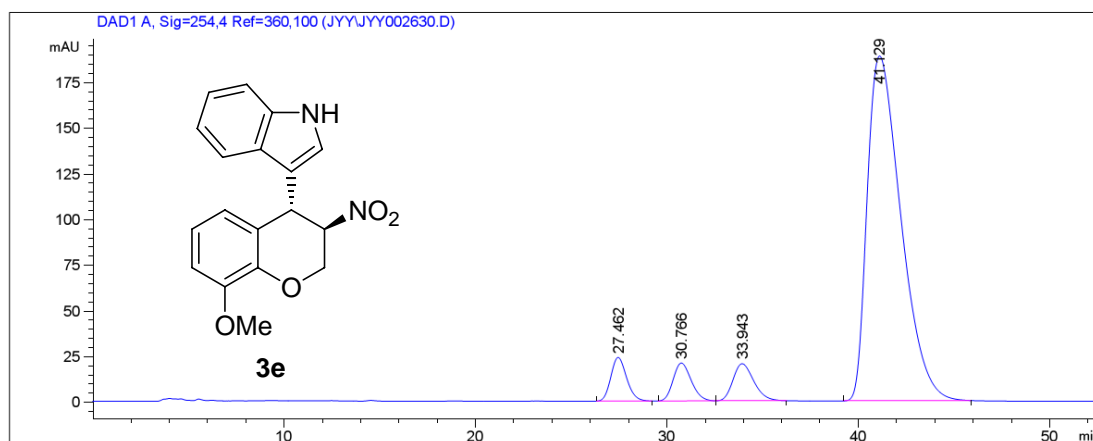

| Peak # | RetTime [min] | Type | Width [min] | Area [mAU*s] | Height [mAU] | Area %  |
|--------|---------------|------|-------------|--------------|--------------|---------|
| 1      | 27.462        | BB   | 0.8884      | 1380.16467   | 23.94649     | 5.0318  |
| 2      | 30.766        | BB   | 1.0221      | 1375.01184   | 20.83080     | 5.0130  |
| 3      | 33.943        | BB   | 1.1637      | 1549.85730   | 20.36802     | 5.6504  |
| 4      | 41.129        | BB   | 1.9250      | 2.31239e4    | 188.78694    | 84.3048 |

**3-(8-Ethoxy-3-nitrochroman-4-yl)-1H-indole (3f):**

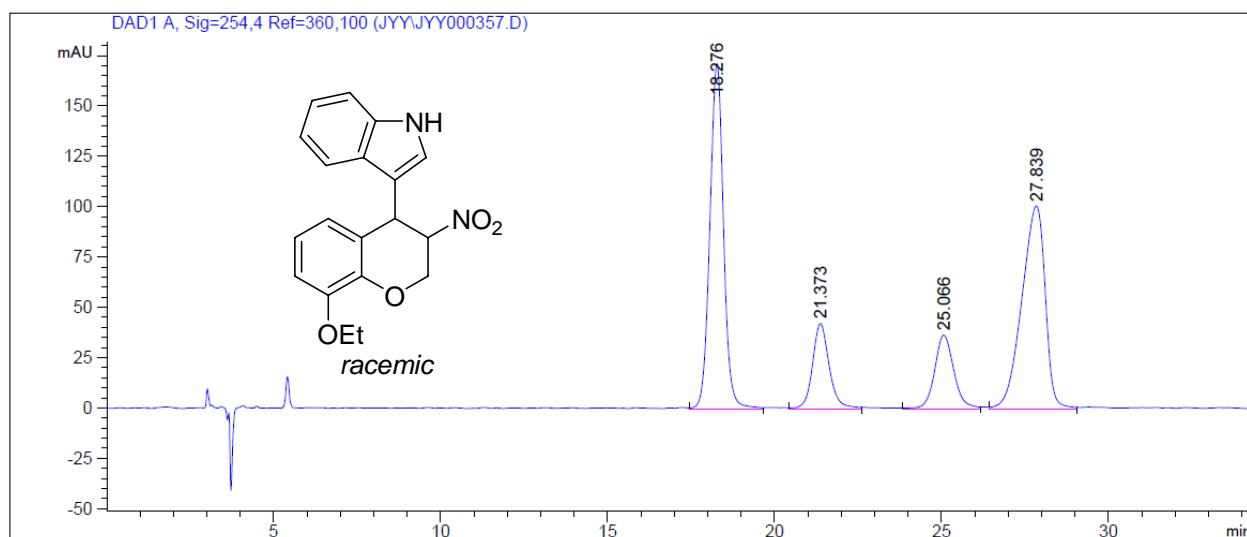

| Peak # | RetTime [min] | Type | Width [min] | Area [mAU*s] | Height [mAU] | Area %  |
|--------|---------------|------|-------------|--------------|--------------|---------|
| 1      | 18.276        | VV   | 0.4387      | 4854.64893   | 171.28030    | 38.3917 |
| 2      | 21.373        | VB   | 0.5191      | 1457.99365   | 42.20021     | 11.5301 |
| 3      | 25.066        | VV   | 0.6067      | 1447.10938   | 36.48869     | 11.4441 |
| 4      | 27.839        | VV   | 0.7624      | 4885.30420   | 100.62844    | 38.6341 |

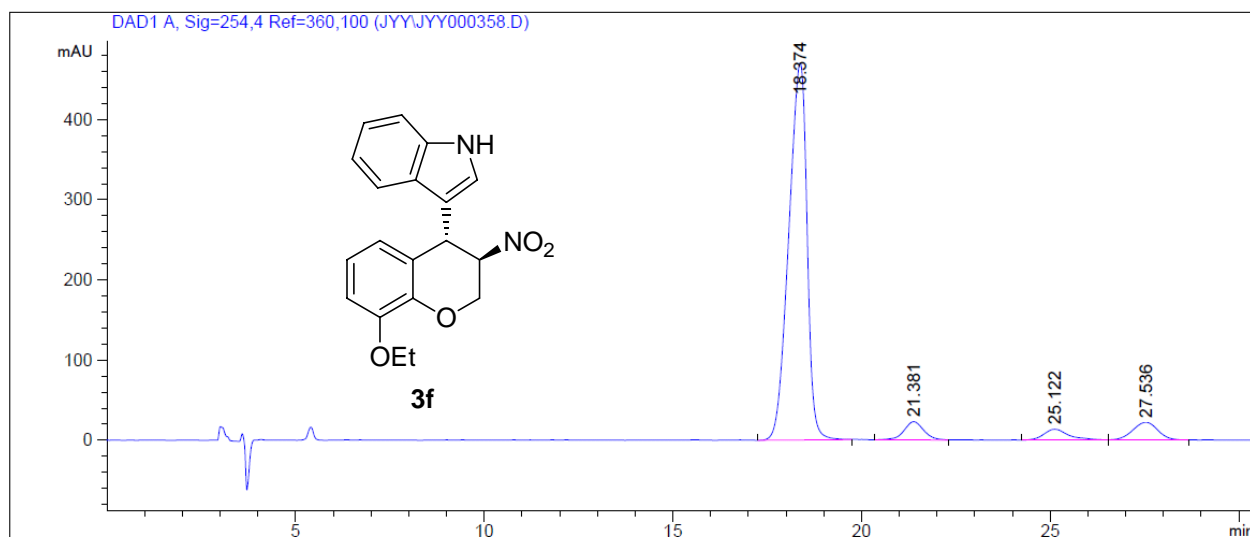

| Peak # | RetTime [min] | Type | Width [min] | Area [mAU*s] | Height [mAU] | Area %  |
|--------|---------------|------|-------------|--------------|--------------|---------|
| 1      | 18.374        | VB   | 0.5318      | 1.57970e4    | 470.43762    | 86.1738 |
| 2      | 21.381        | BV   | 0.5575      | 830.31232    | 22.76814     | 4.5294  |
| 3      | 25.122        | VV   | 0.7096      | 650.11914    | 13.70155     | 3.5464  |
| 4      | 27.536        | VV   | 0.7414      | 1054.13184   | 22.38594     | 5.7504  |

**3-[2,3-Dihydro-2-nitro-1H-naphtho[2,1-b]pyran-1-yl]-1H-indole (3g):**

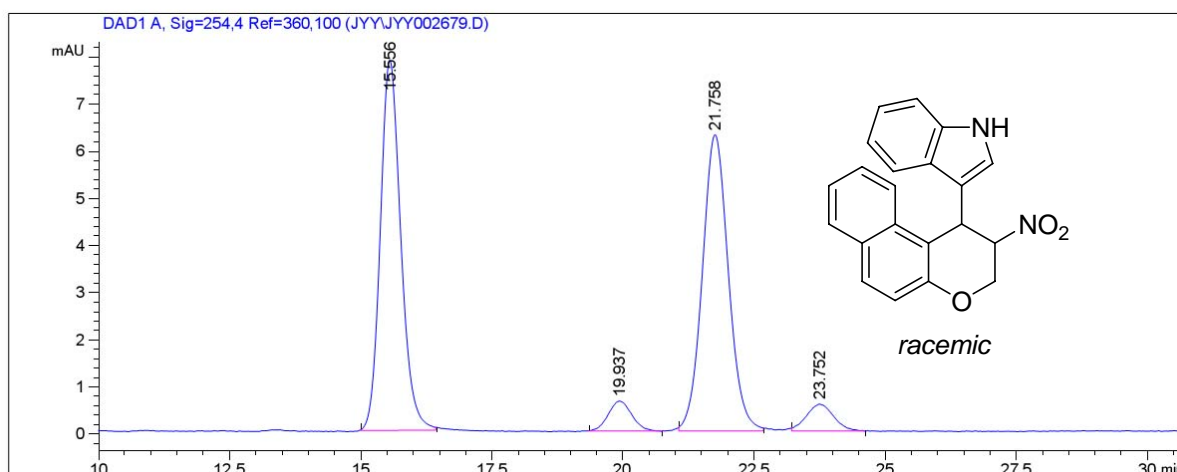

| Peak # | RetTime [min] | Type | Width [min] | Area [mAU*s] | Height [mAU] | Area %  |
|--------|---------------|------|-------------|--------------|--------------|---------|
| 1      | 15.556        | BB   | 0.4168      | 213.30362    | 7.85587      | 45.2673 |
| 2      | 19.937        | BB   | 0.4376      | 19.92599     | 6.35945e-1   | 4.2287  |
| 3      | 21.758        | BB   | 0.5310      | 217.08768    | 6.28417      | 46.0704 |
| 4      | 23.752        | BB   | 0.5454      | 20.89149     | 5.72886e-1   | 4.4336  |

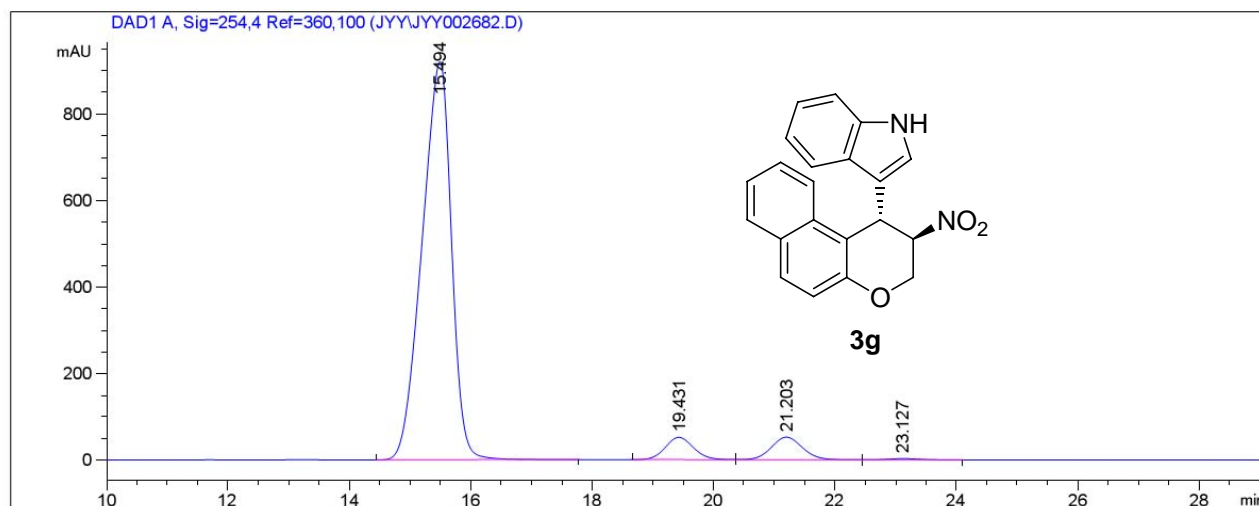

| Peak # | RetTime [min] | Type | Width [min] | Area [mAU*s] | Height [mAU] | Area %  |
|--------|---------------|------|-------------|--------------|--------------|---------|
| 1      | 15.494        | BB   | 0.5208      | 3.09579e4    | 919.43878    | 89.2353 |
| 2      | 19.431        | BV   | 0.5076      | 1709.98206   | 52.00088     | 4.9290  |
| 3      | 21.203        | VV   | 0.5584      | 1904.27563   | 52.58999     | 5.4890  |
| 4      | 23.127        | VB   | 0.5963      | 120.28685    | 3.10254      | 0.3467  |

**3-(6,8-Dichloro-3-nitrochroman-4-yl)-1H-indole (3h):**

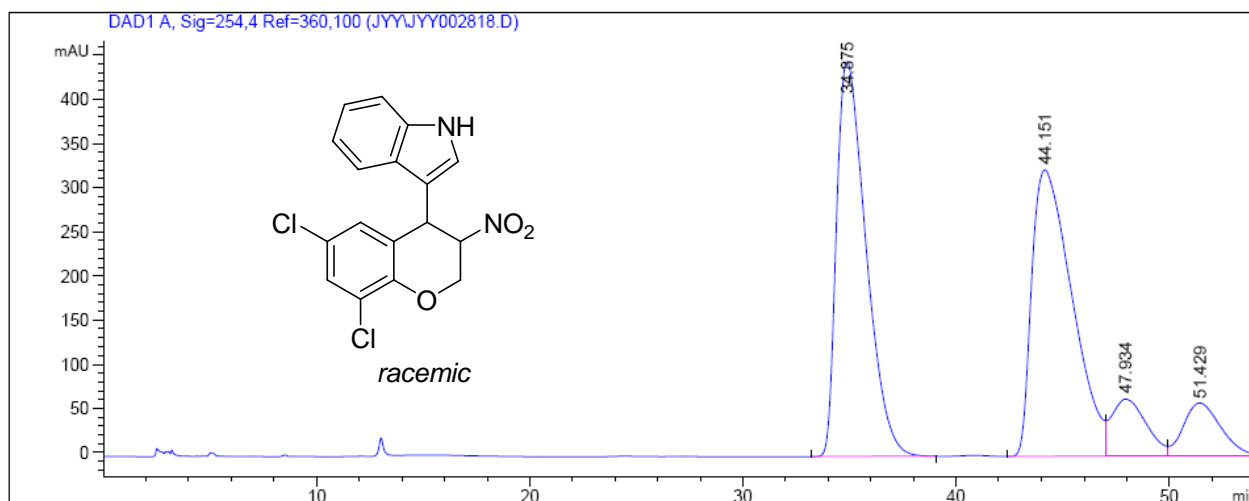

| Peak # | RetTime [min] | Type | Width [min] | Area [mAU*s] | Height [mAU] | Area %  |
|--------|---------------|------|-------------|--------------|--------------|---------|
| 1      | 34.875        | BB   | 1.4167      | 4.29259e4    | 446.85843    | 42.7888 |
| 2      | 44.151        | VV   | 2.0282      | 4.25926e4    | 324.30716    | 42.4565 |
| 3      | 47.934        | VV   | 1.6327      | 7390.84424   | 64.89440     | 7.3672  |
| 4      | 51.429        | VBA  | 1.7852      | 7411.13965   | 60.32864     | 7.3875  |

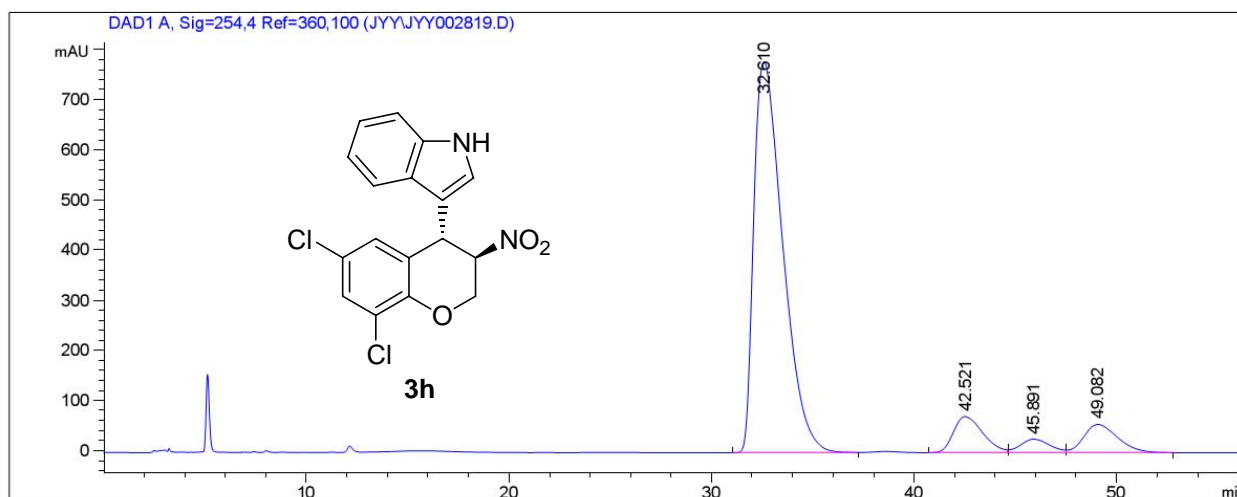

| Peak # | RetTime [min] | Type | Width [min] | Area [mAU*s] | Height [mAU] | Area %  |
|--------|---------------|------|-------------|--------------|--------------|---------|
| 1      | 32.610        | BB   | 1.5550      | 7.74940e4    | 780.08301    | 82.3645 |
| 2      | 42.521        | VV   | 1.5360      | 7266.75244   | 72.09010     | 7.7235  |
| 3      | 45.891        | VV   | 1.4829      | 2728.83545   | 27.09795     | 2.9003  |
| 4      | 49.082        | VB   | 1.6779      | 6597.06250   | 56.34853     | 7.0117  |



**3-(6,8-Dibromo-3-nitrochroman-4-yl)-1H-indole (3i):**

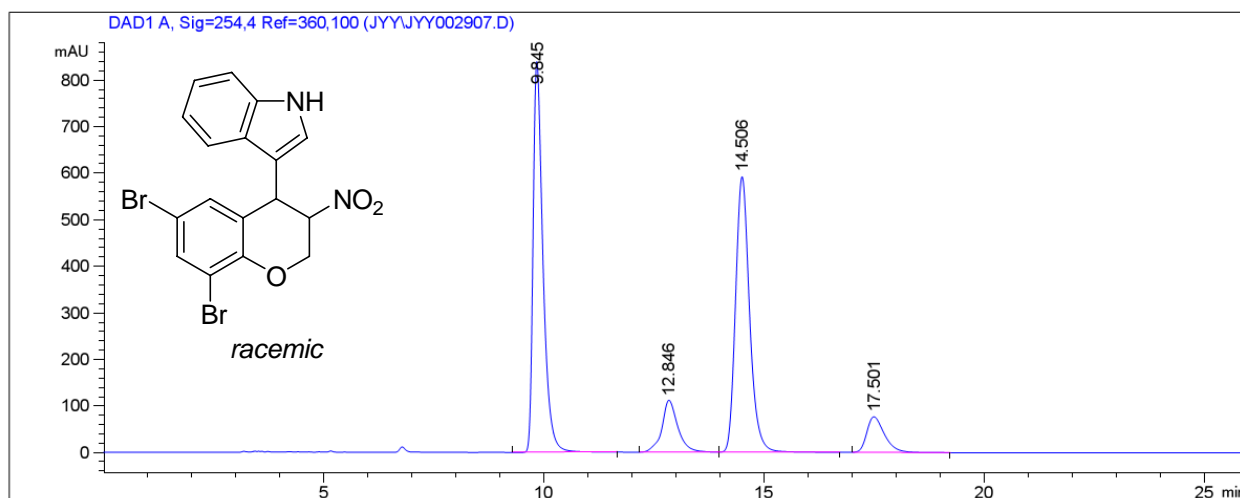

| Peak # | RetTime [min] | Type | Width [min] | Area [mAU*s] | Height [mAU] | Area %  |
|--------|---------------|------|-------------|--------------|--------------|---------|
| 1      | 9.845         | VB S | 0.2339      | 1.30857e4    | 839.46094    | 41.9072 |
| 2      | 12.846        | BV   | 0.3719      | 2836.36621   | 111.81458    | 9.0835  |
| 3      | 14.506        | VB   | 0.3388      | 1.31429e4    | 592.54956    | 42.0903 |
| 4      | 17.501        | BB   | 0.4277      | 2160.49756   | 76.91081     | 6.9190  |

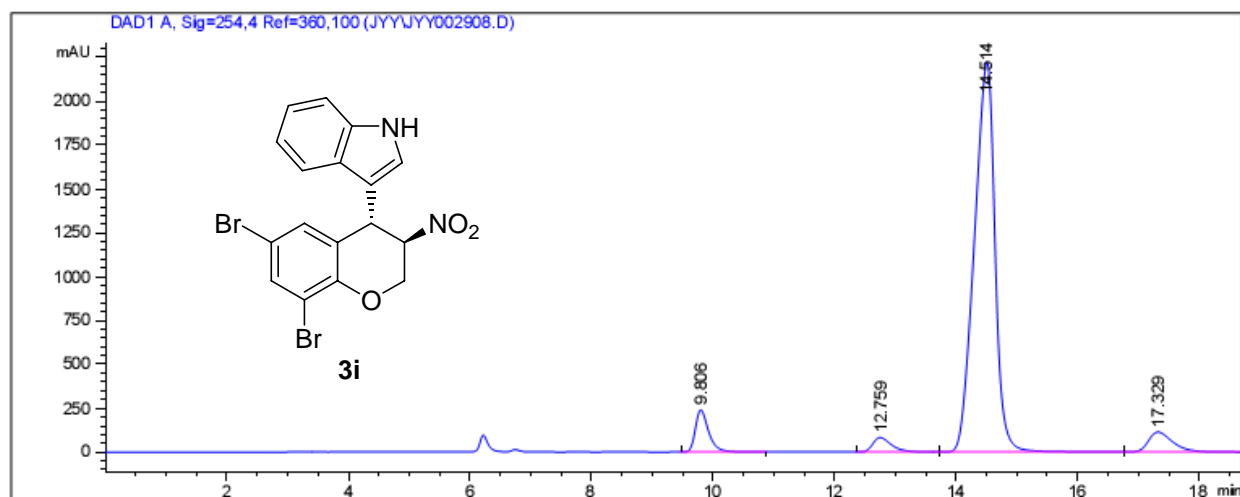

| Peak # | RetTime [min] | Type | Width [min] | Area [mAU*s] | Height [mAU] | Area %  |
|--------|---------------|------|-------------|--------------|--------------|---------|
| 1      | 9.806         | VB S | 0.2282      | 3622.29907   | 239.80441    | 5.9485  |
| 2      | 12.759        | BV   | 0.3215      | 1764.83423   | 82.50871     | 2.8982  |
| 3      | 14.514        | VV   | 0.3626      | 5.23130e4    | 2222.94092   | 85.9074 |
| 4      | 17.329        | VBA  | 0.4230      | 3194.52344   | 113.97450    | 5.2460  |

### 5-Methyl-3-(3-nitrochroman-4-yl)-1H-indole (3j):

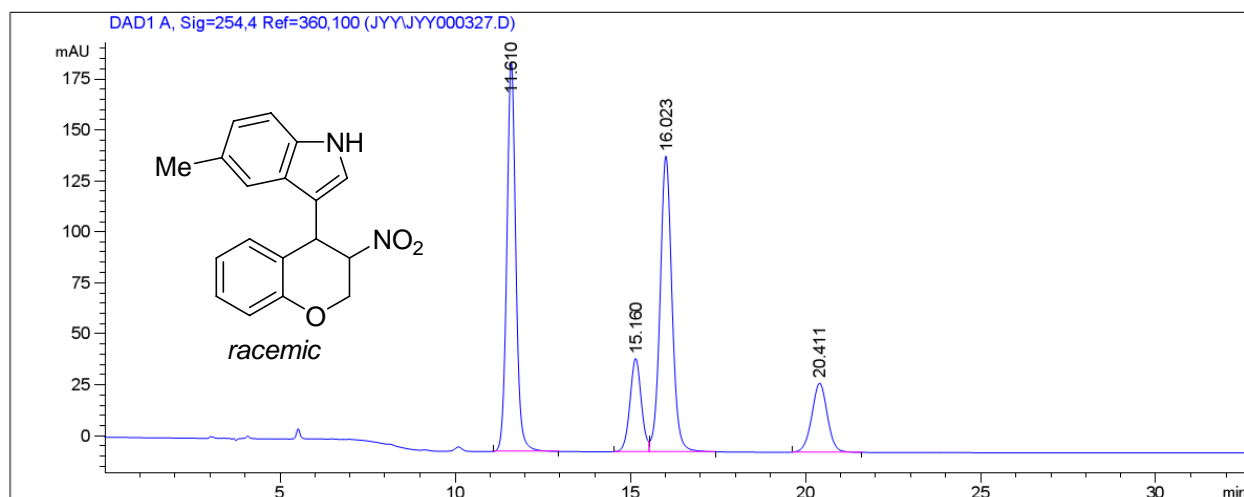

| Peak # | RetTime [min] | Type | Width [min] | Area [mAU*s] | Height [mAU] | Area %  |
|--------|---------------|------|-------------|--------------|--------------|---------|
| 1      | 11.610        | BB   | 0.2720      | 3409.17969   | 191.18457    | 38.1898 |
| 2      | 15.160        | BV   | 0.3444      | 1036.91089   | 45.76041     | 11.6155 |
| 3      | 16.023        | VB   | 0.3597      | 3428.53589   | 145.06996    | 38.4066 |
| 4      | 20.411        | BB   | 0.4744      | 1052.31604   | 33.88070     | 11.7881 |

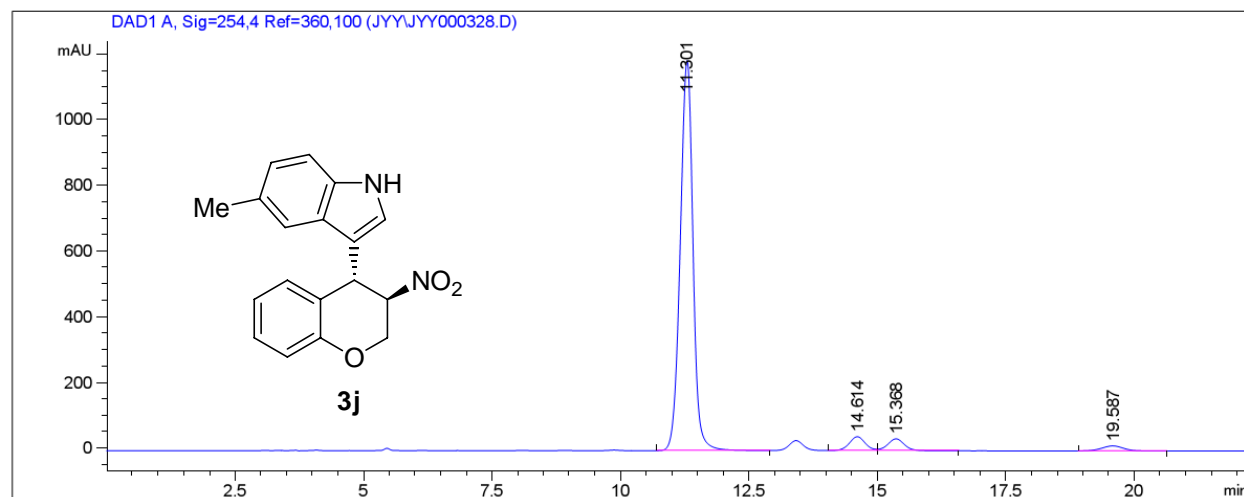

| Peak # | RetTime [min] | Type | Width [min] | Area [mAU*s] | Height [mAU] | Area %  |
|--------|---------------|------|-------------|--------------|--------------|---------|
| 1      | 11.301        | BV   | 0.2653      | 2.04901e4    | 1187.40747   | 90.1361 |
| 2      | 14.614        | VV   | 0.3364      | 941.49548    | 42.84520     | 4.1416  |
| 3      | 15.368        | VB   | 0.3514      | 836.71680    | 36.50990     | 3.6807  |
| 4      | 19.587        | BB   | 0.4592      | 464.08765    | 15.59288     | 2.0415  |

**5-Methoxy-3-(3-nitrochroman-4-yl)-1H-indole (3k):**

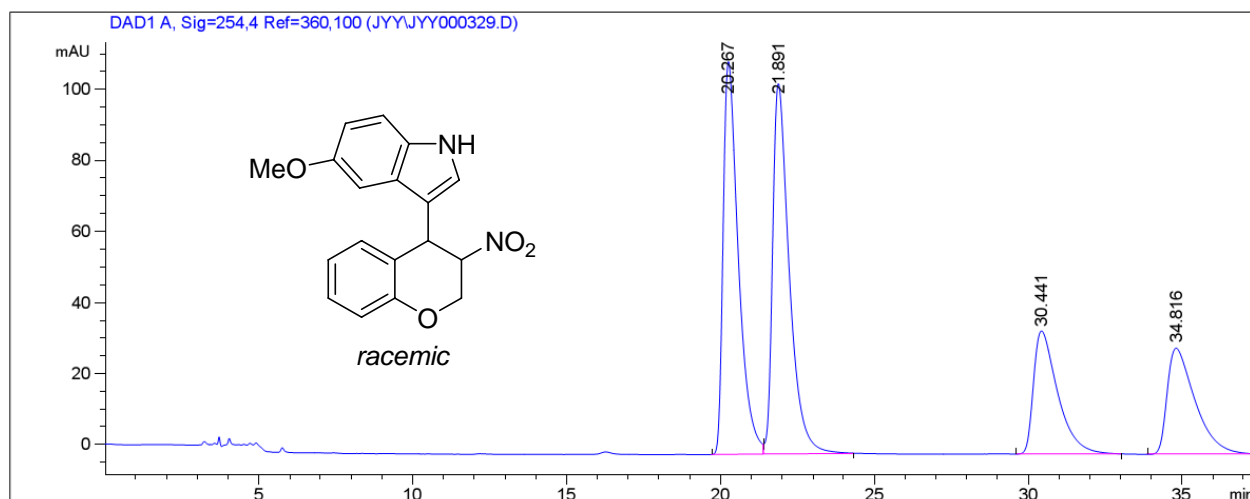

| Peak # | RetTime [min] | Type | Width [min] | Area [mAU*s] | Height [mAU] | Area %  |
|--------|---------------|------|-------------|--------------|--------------|---------|
| 1      | 20.267        | BV   | 0.5173      | 3801.46753   | 110.51521    | 33.0421 |
| 2      | 21.891        | VB   | 0.5671      | 3923.24878   | 104.23664    | 34.1006 |
| 3      | 30.441        | BB   | 0.8160      | 1900.02258   | 34.63675     | 16.5149 |
| 4      | 34.816        | BBA  | 0.9468      | 1880.19409   | 29.85160     | 16.3425 |

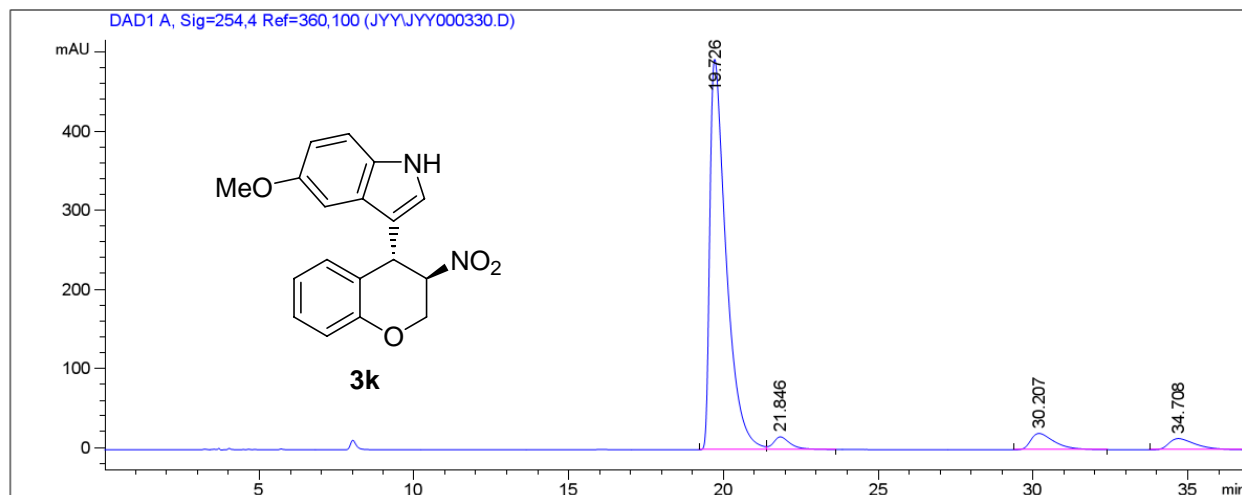

| Peak # | RetTime [min] | Type | Width [min] | Area [mAU*s] | Height [mAU] | Area %  |
|--------|---------------|------|-------------|--------------|--------------|---------|
| 1      | 19.726        | BV   | 0.5440      | 1.81083e4    | 493.65469    | 87.4893 |
| 2      | 21.846        | VB   | 0.5798      | 637.70428    | 16.17992     | 3.0810  |
| 3      | 30.207        | BB   | 0.7964      | 1101.30579   | 20.57742     | 5.3209  |
| 4      | 34.708        | BB   | 0.9040      | 850.42389    | 14.09416     | 4.1088  |

**5-Chloro-3-(3-nitrochroman-4-yl)-1H-indole (3l):**

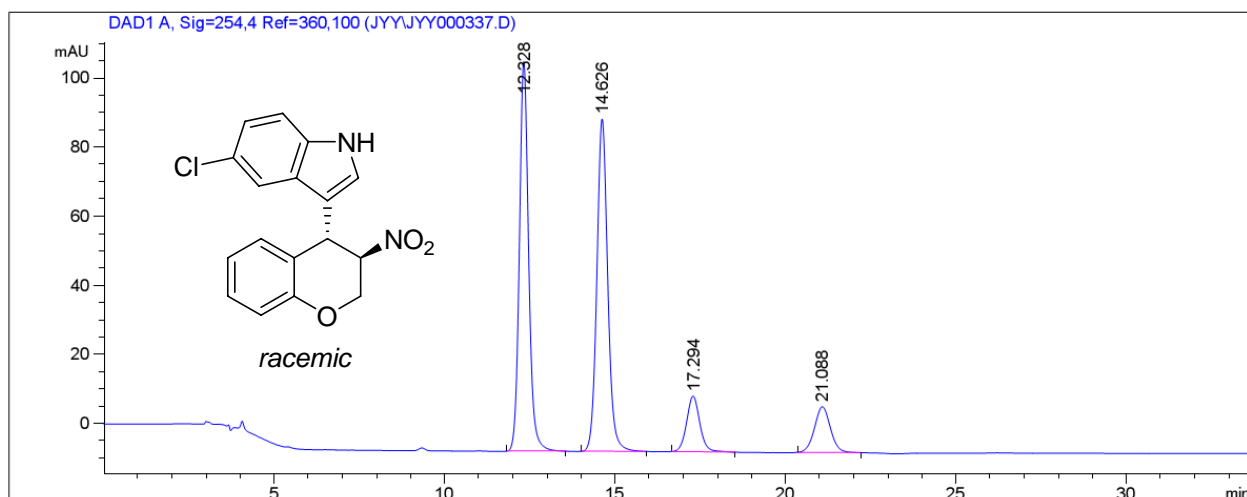

| Peak # | RetTime [min] | Type | Width [min] | Area [mAU*s] | Height [mAU] | Area %  |
|--------|---------------|------|-------------|--------------|--------------|---------|
| 1      | 12.328        | BB   | 0.2889      | 2136.39697   | 112.83144    | 41.4562 |
| 2      | 14.626        | BB   | 0.3391      | 2137.53101   | 96.25804     | 41.4782 |
| 3      | 17.294        | BB   | 0.4131      | 439.24487    | 16.15845     | 8.5234  |
| 4      | 21.088        | BB   | 0.5011      | 440.20538    | 13.33634     | 8.5421  |

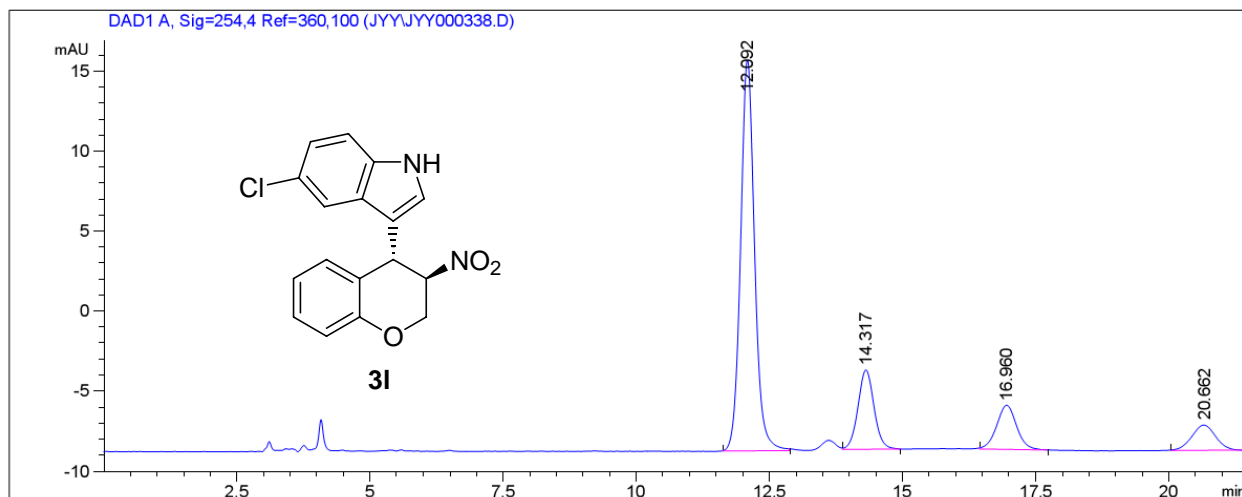

| Peak # | RetTime [min] | Type | Width [min] | Area [mAU*s] | Height [mAU] | Area %  |
|--------|---------------|------|-------------|--------------|--------------|---------|
| 1      | 12.092        | BB   | 0.2767      | 445.74820    | 24.44388     | 66.2055 |
| 2      | 14.317        | VB   | 0.3227      | 105.23866    | 4.97783      | 15.6307 |
| 3      | 16.960        | BB   | 0.3982      | 72.63189     | 2.76746      | 10.7878 |
| 4      | 20.662        | BBA  | 0.4895      | 49.66105     | 1.58526      | 7.3760  |

### 1-Methyl-3-(3-nitrochroman-4-yl)-1H-indole (3m):

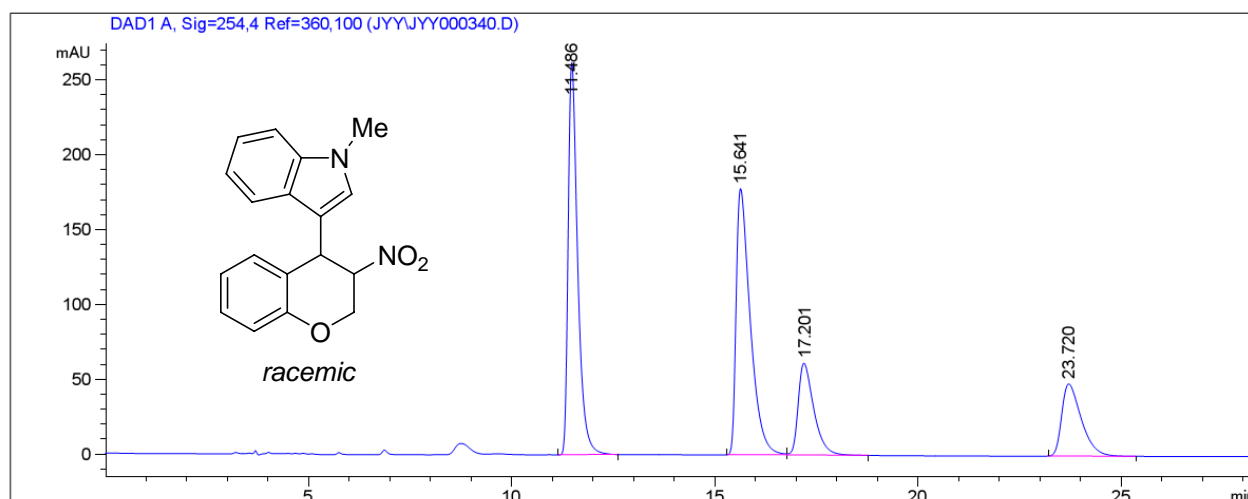

| Peak # | RetTime [min] | Type | Width [min] | Area [mAU*s] | Height [mAU] | Area %  |
|--------|---------------|------|-------------|--------------|--------------|---------|
| 1      | 11.486        | VB   | 0.2465      | 4276.71875   | 261.89624    | 36.0588 |
| 2      | 15.641        | BV   | 0.3622      | 4302.91260   | 177.89870    | 36.2796 |
| 3      | 17.201        | VB   | 0.4059      | 1654.14014   | 61.47704     | 13.9467 |
| 4      | 23.720        | BB   | 0.5089      | 1626.63623   | 48.30076     | 13.7148 |

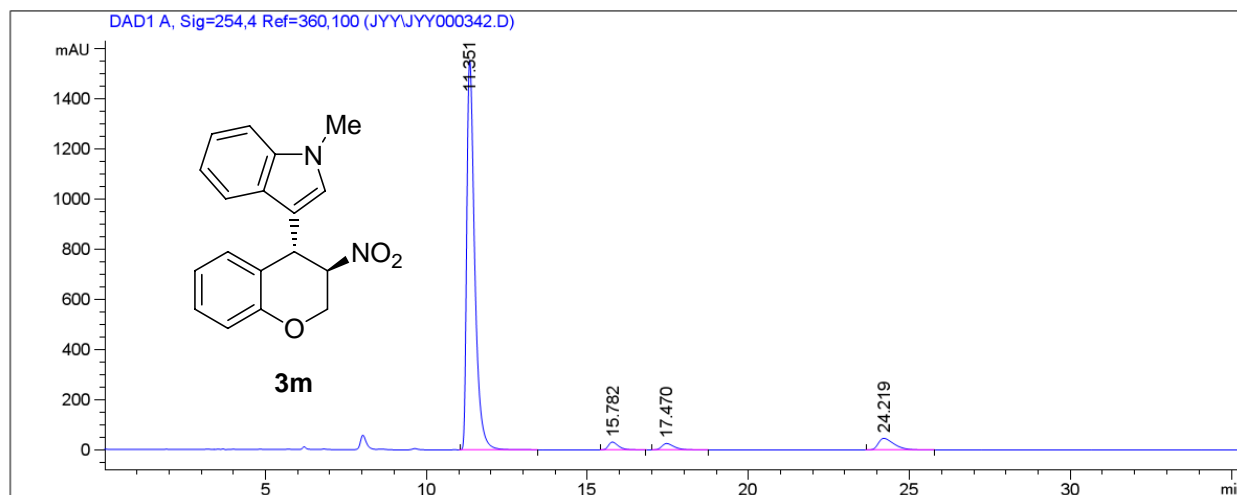

| Peak # | RetTime [min] | Type | Width [min] | Area [mAU*s] | Height [mAU] | Area %  |
|--------|---------------|------|-------------|--------------|--------------|---------|
| 1      | 11.351        | VB   | 0.2601      | 2.66035e4    | 1551.30811   | 89.9240 |
| 2      | 15.782        | BB   | 0.3371      | 687.28400    | 31.18877     | 2.3231  |
| 3      | 17.470        | BB   | 0.4158      | 699.90277    | 25.53494     | 2.3658  |
| 4      | 24.219        | BB   | 0.5217      | 1593.72607   | 46.28685     | 5.3870  |

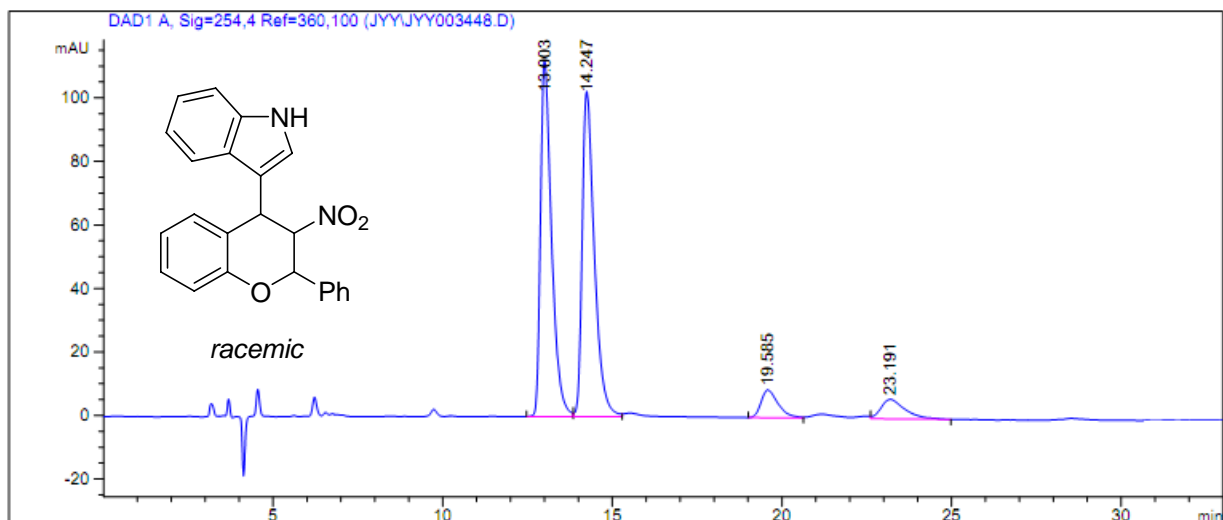

| Peak # | RetTime [min] | Type | Width [min] | Area [mAU*s] | Height [mAU] | Area %  |
|--------|---------------|------|-------------|--------------|--------------|---------|
| 1      | 13.003        | BV   | 0.3393      | 2529.69043   | 112.10420    | 44.4087 |
| 2      | 14.247        | VV   | 0.3792      | 2556.90845   | 102.44094    | 44.8865 |
| 3      | 19.585        | BV   | 0.5302      | 306.94028    | 8.72936      | 5.3883  |
| 4      | 23.191        | VB   | 0.7319      | 302.84985    | 6.13467      | 5.3165  |

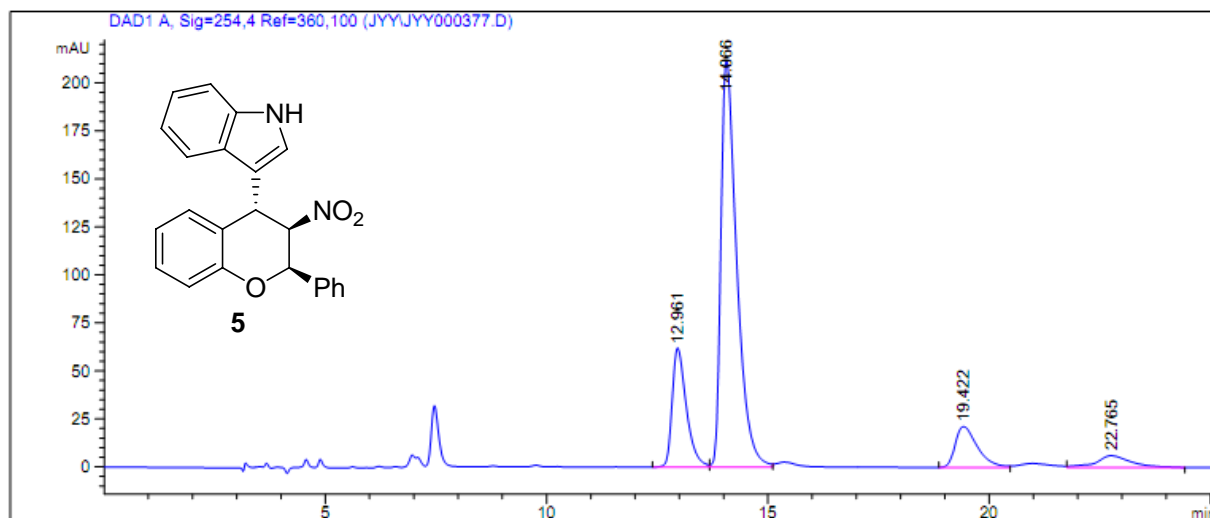

| Peak # | RetTime [min] | Type | Width [min] | Area [mAU*s] | Height [mAU] | Area %  |
|--------|---------------|------|-------------|--------------|--------------|---------|
| 1      | 12.961        | BV   | 0.3363      | 1385.25781   | 62.09427     | 17.9071 |
| 2      | 14.066        | VV   | 0.3741      | 5267.75879   | 211.82053    | 68.0960 |
| 3      | 19.422        | BV   | 0.5324      | 740.38348    | 21.35705     | 9.5709  |
| 4      | 22.765        | VB   | 0.7790      | 342.38205    | 6.17335      | 4.4260  |

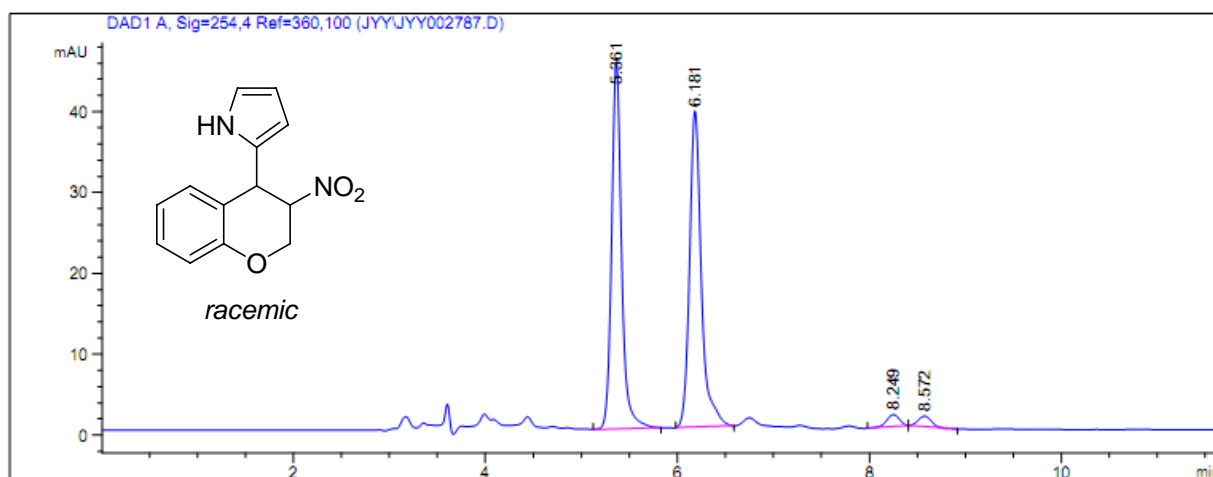

| Peak # | RetTime [min] | Type | Width [min] | Area [mAU*s] | Height [mAU] | Area %  |
|--------|---------------|------|-------------|--------------|--------------|---------|
| 1      | 5.361         | VB S | 0.1085      | 328.60657    | 45.34459     | 47.7845 |
| 2      | 6.181         | BB S | 0.1277      | 333.49896    | 39.00608     | 48.4959 |
| 3      | 8.249         | BB   | 0.1437      | 13.71888     | 1.48664      | 1.9949  |
| 4      | 8.572         | BB   | 0.1457      | 11.86039     | 1.30854      | 1.7247  |

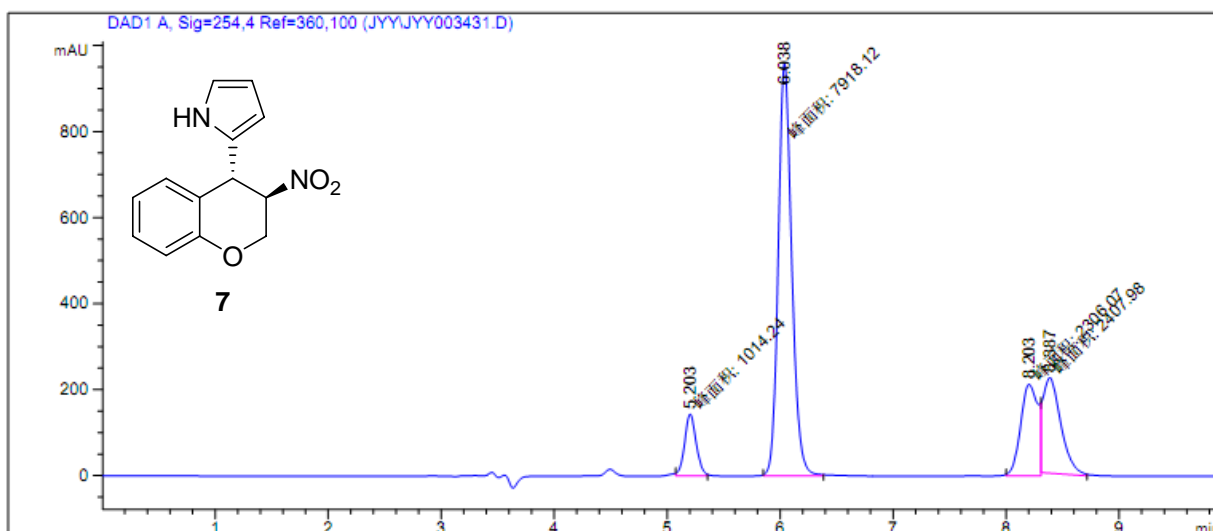

| Peak # | RetTime [min] | Type | Width [min] | Area [mAU*s] | Height [mAU] | Area %  |
|--------|---------------|------|-------------|--------------|--------------|---------|
| 1      | 5.203         | MM   | 0.1172      | 1014.23926   | 144.22031    | 7.4323  |
| 2      | 6.038         | MM   | 0.1370      | 7918.12256   | 963.33899    | 58.0235 |
| 3      | 8.203         | MM   | 0.1801      | 2306.06738   | 213.36264    | 16.8987 |
| 4      | 8.387         | MM   | 0.1804      | 2407.97754   | 222.42679    | 17.6455 |
